# Supplementary material
Source: PubMed Central journal article supplement (PMC2756100)
Supplement: NIHMS104742-supplement-1.pdf [file NIHMS104742-supplement-1.pdf]

targets. Experiment numbers are indicated in parentheses. **B)** Loci were sorted by their change in nucleosome occupancy upon glucose depletion. A moving average of the change in Rap1 occupancy upon glucose depletion is plotted on the y-axis. **C)** Intergenic regions were grouped into three categories based on their Rap1 binding affinity (high, intermediate, or low affinity) as measured by PBM<sup>29</sup>. The 306 high-affinity regions had PBM p-values less than  $1 \times 10^{-6}$ , the 288 intermediate affinity regions had PBM p-values between 0.01 and  $1 \times 10^{-6}$ , and the remaining 4945 sites were classified as low-affinity. The average change in Rap1 occupancy (x axis) was determined for each group as a function of the change in nucleosome occupancy (y axis). **D)** Low-glucose Rap1 targets are on a nucleosomal hair-trigger. Nucleosome occupancy in the presence (black) and absence (gray) of glucose is plotted for all yeast intergenic regions. Values are relative to static Rap1 targets in the presence of glucose. Intergenic regions were separated into five groups: static Rap1 targets, low-glucose Rap1 targets, unbound loci containing high-affinity Rap1 sites, unbound loci containing intermediate-affinity Rap1 sites and unbound loci containing low-affinity Rap1 sites.

**Figure 6. A “nucleosomal hair-trigger” model for condition-dependent transcription factor binding through coordinated interplay between local chromatin structure and DNA-binding affinity.**

See text for details. Note that rather than the typical case of chromatin remodeling proteins acting to remove a nucleosome to effect activation, in this mechanism the enzymes act to position nucleosomes into a repressive configuration. Therefore, the default state of this system is factor binding and gene activation.

**Supplemental Figure 1. Rap1 protein and mRNA levels decrease as glucose is depleted.**

**A)** 20  $\mu$ g of whole-cell extract was separated by a 12% SDS-PAGE gel and probed with anti-

Rap1 antibody. **B)** mRNA levels for Rap1, as measured by microarray<sup>43</sup>, decrease upon diauxic shift.

**Supplemental Figure 2. Confirmation of ChIP-chip results.** **A.** Representative agarose gel image of ChIP-PCR results, showing results from two genomic regions upstream of *ENB1* and *VHS1*. ChIP (IP) samples are loaded next to their corresponding input (IN). The top band in every lane is the test fragment, and the bottom band is specific to a control (YHR131C). **B.** The average ratio (IP/Input) for Rap1 IPs, during exponential growth, after depletion of glucose (72 hrs), and in a *tup1Δ* background, is plotted with their standard error at 11 loci. The ratio for any site is determined by the (intensity of the test fragment in IP / intensity of the control fragment in IP) / (intensity of the test fragment in input / intensity of the control fragment in input). **C.** The average ratio (IP/Input) for Tup1 IPs is plotted with their standard error at 11 loci. **D.** Two biological replicates of Rap1 ChIPs after glucose depletion (72 hrs) were hybridized directly on the same microarray with Rap1 ChIPs from cells grown in high glucose. The average ratios reported from probes representing the 52 low-glucose Rap1 targets, 262 static Rap1 targets, and telomeric targets is plotted, along with their standard errors.

**Supplemental Figure 3. Confirmation of ChIP-chip results at the SGA1 locus.**

**A.** The open reading frames for *SGA1* and *FMC1* are shown. An upstream dubious open reading frame is shaded grey. Arrows indicate direction of transcription. The regions tested by ChIP-PCR (A-D) and the elements on the microarray (1-7) are shown below. **B.** Rap1 IPs during exponential growth (+ glucose) as measured by the microarray (top; 8 replicates) and PCR (bottom; 4 replicates). **C.** Rap1 IPs in low glucose (72 hrs) as measured by the microarray (top; 7 replicates) and PCR (bottom; 4 replicates). **D.** Tup1 IPs during exponential growth (+ glucose) as measured by microarray (top; 8 replicate) and PCR (bottom; 3 replicates). **E.** The enrichment at microarray element 4 is shown for the entire timecourse. **F.** A

representative gel image for one replicate at each PCR region. IP (IP) samples are loaded next to their corresponding input (IN). The top band in every lane is the test fragment, which is compared to the bottom control band (YHR131C).

**Supplemental Figure 4. Computational screens predict the involvement of Tup1-Ssn6 proteins in blocking Rap1p binding.**

**A.** Schematic representation of two computational screens for effector of Rap1 conditional binding. Screen 1 compares low-glucose targets versus static targets and screen 2 compares low-glucose targets versus all yeast intergenic regions. **B.** Results for the two computational screens listed by Pearson correlation ( $r$ ) to the classifier variable. The p-value was estimated by 10,000 permutations. The GO biological process is listed for each protein (lower row).

**Supplemental Figure 5. Rap1 binding and glycolysis**

**A)** Rap1 binds upstream of at least one enzyme involved in each of the eleven steps required to metabolize glucose into ethanol. Static Rap1 targets are shown in red and low-glucose targets are in blue. Arrows indicate the flow of substrate. **B)** During growth in low-glucose, Rap1 binds upstream of genes involved in alternative carbon-source utilization.

# A

## Rap1 protein levels decrease upon glucose depletion

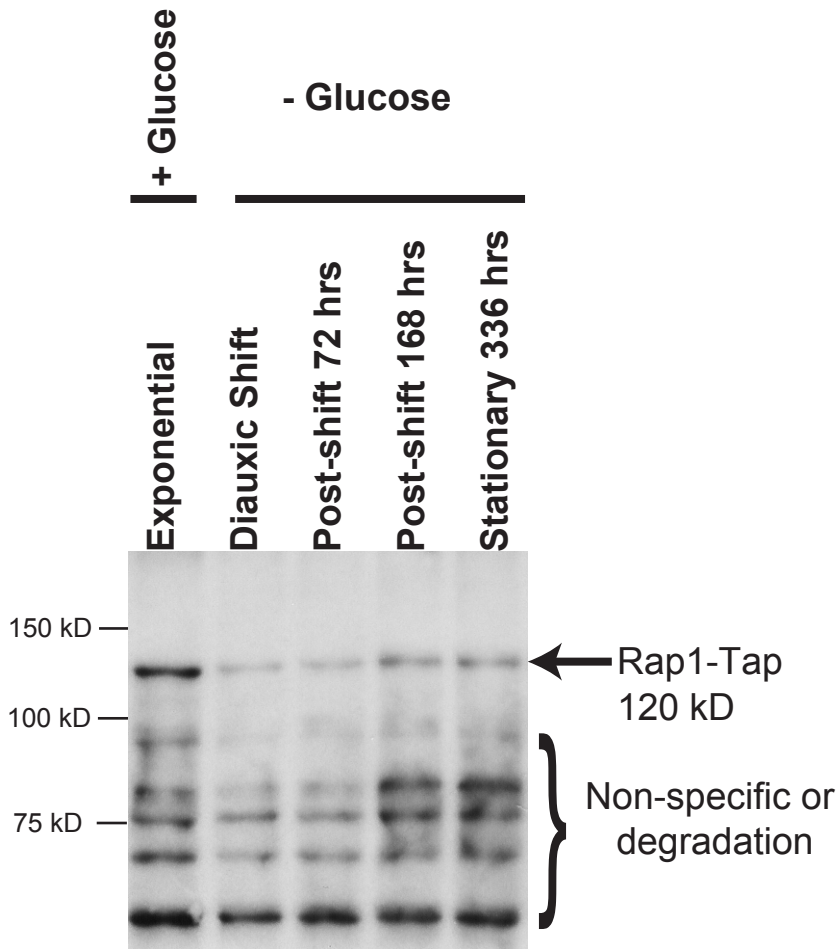

# B

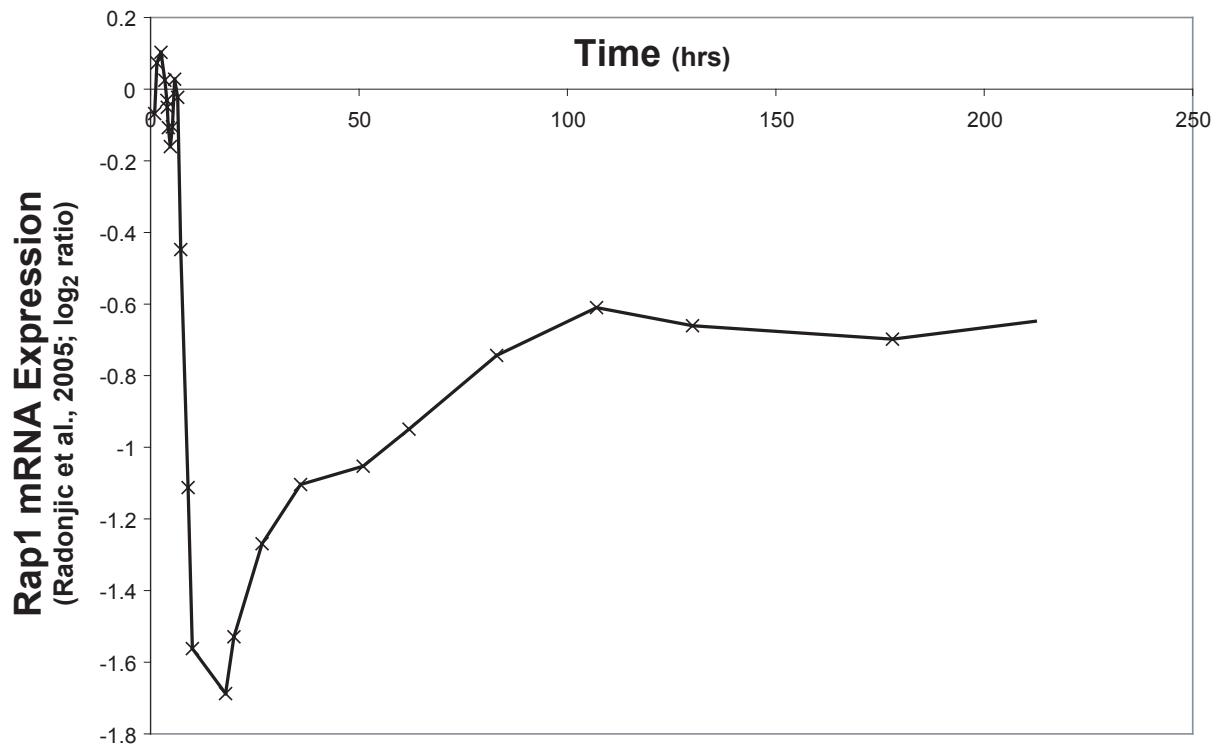

**A**

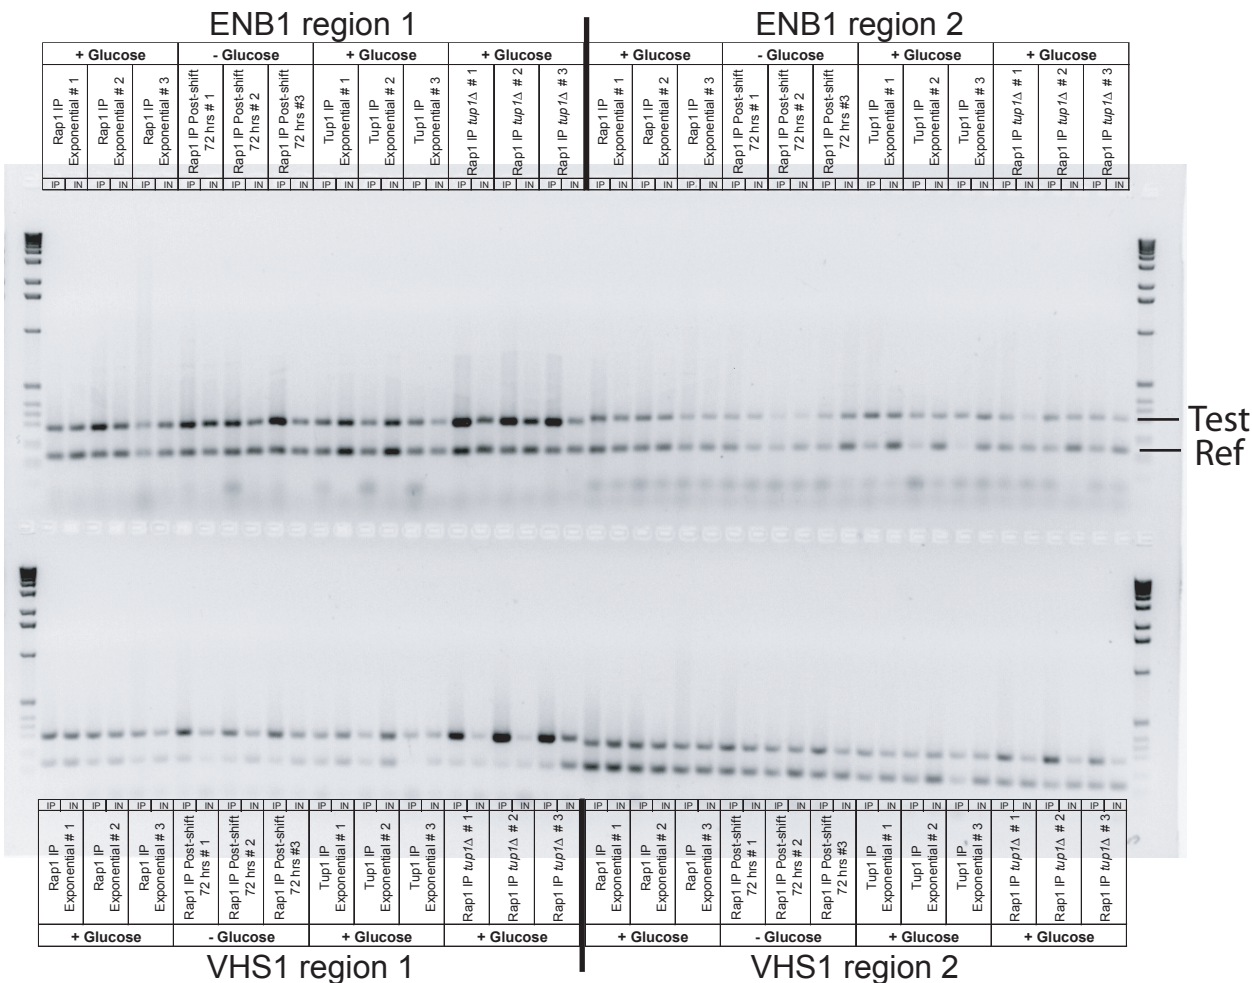

**B**

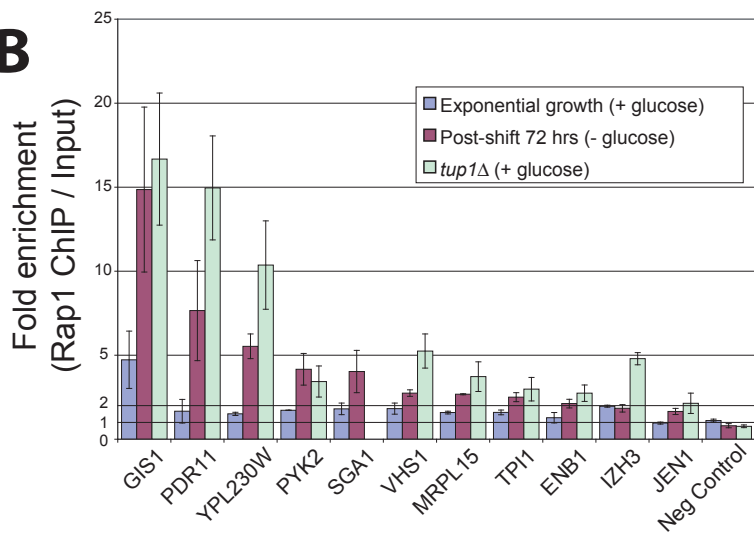

**C**

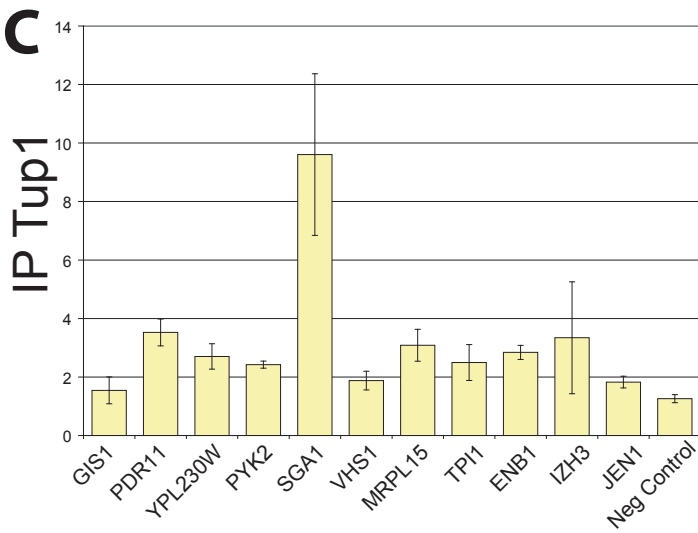

**D**

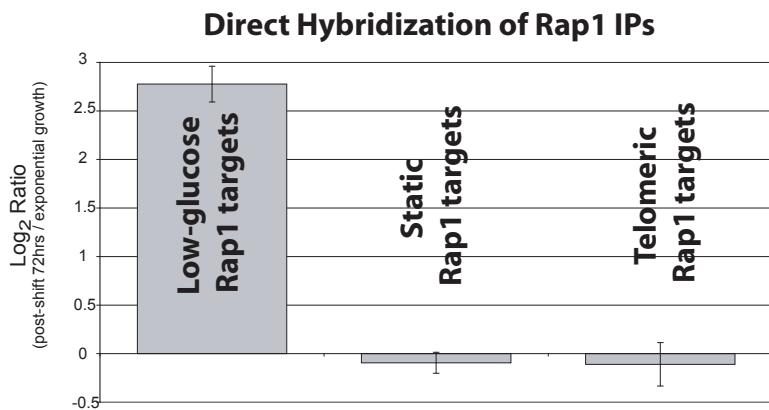



**A**

**Computational Screen 1**

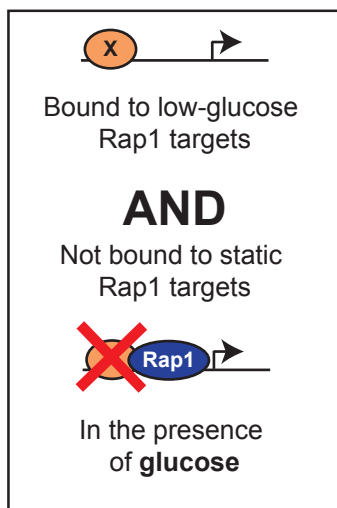

**Computational Screen 2**

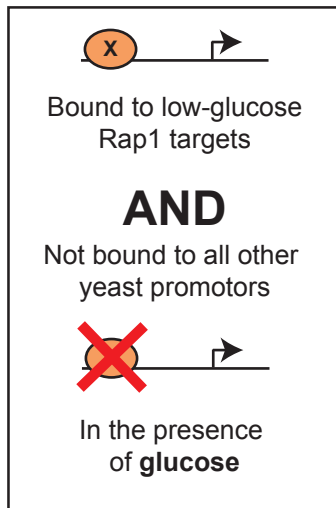

**B**

**Computational Screen 1**

|             | Description                                         | r       |
|-------------|-----------------------------------------------------|---------|
| <b>Mig1</b> | <b>Tup1 associated factor</b><br>Glucose metabolism | 0.25 ** |
| <b>Sut1</b> | <b>Tup1 associated factor</b><br>Sterol transport   | 0.23 ** |
| <b>Gat1</b> | Regulation of nitrogen utilization                  | 0.23 ** |
| <b>Nrg1</b> | <b>Tup1 associated factor</b><br>Glucose metabolism | 0.23 ** |
| <b>Dot6</b> | Chromatin silencing at telomere                     | 0.22 ** |

**Computational Screen 2**

|             | Description                                                           | r       |
|-------------|-----------------------------------------------------------------------|---------|
| <b>Sut1</b> | <b>Tup1 associated factor</b><br>Sterol transport                     | 0.14 ** |
| <b>Swi4</b> | G1/S transition of mitotic cell cycle                                 | 0.09 ** |
| <b>Nrg1</b> | <b>Tup1 associated factor</b><br>Glucose metabolism                   | 0.09 ** |
| <b>Phd1</b> | Pseudohyphal growth                                                   | 0.09 ** |
| <b>Sko1</b> | <b>Tup1 associated factor</b><br>Negative regulation of transcription | 0.07 *  |

\*\* p < 0.00001; \* p < 0.0001

Supplemental Figure 5. Buck and Lieb

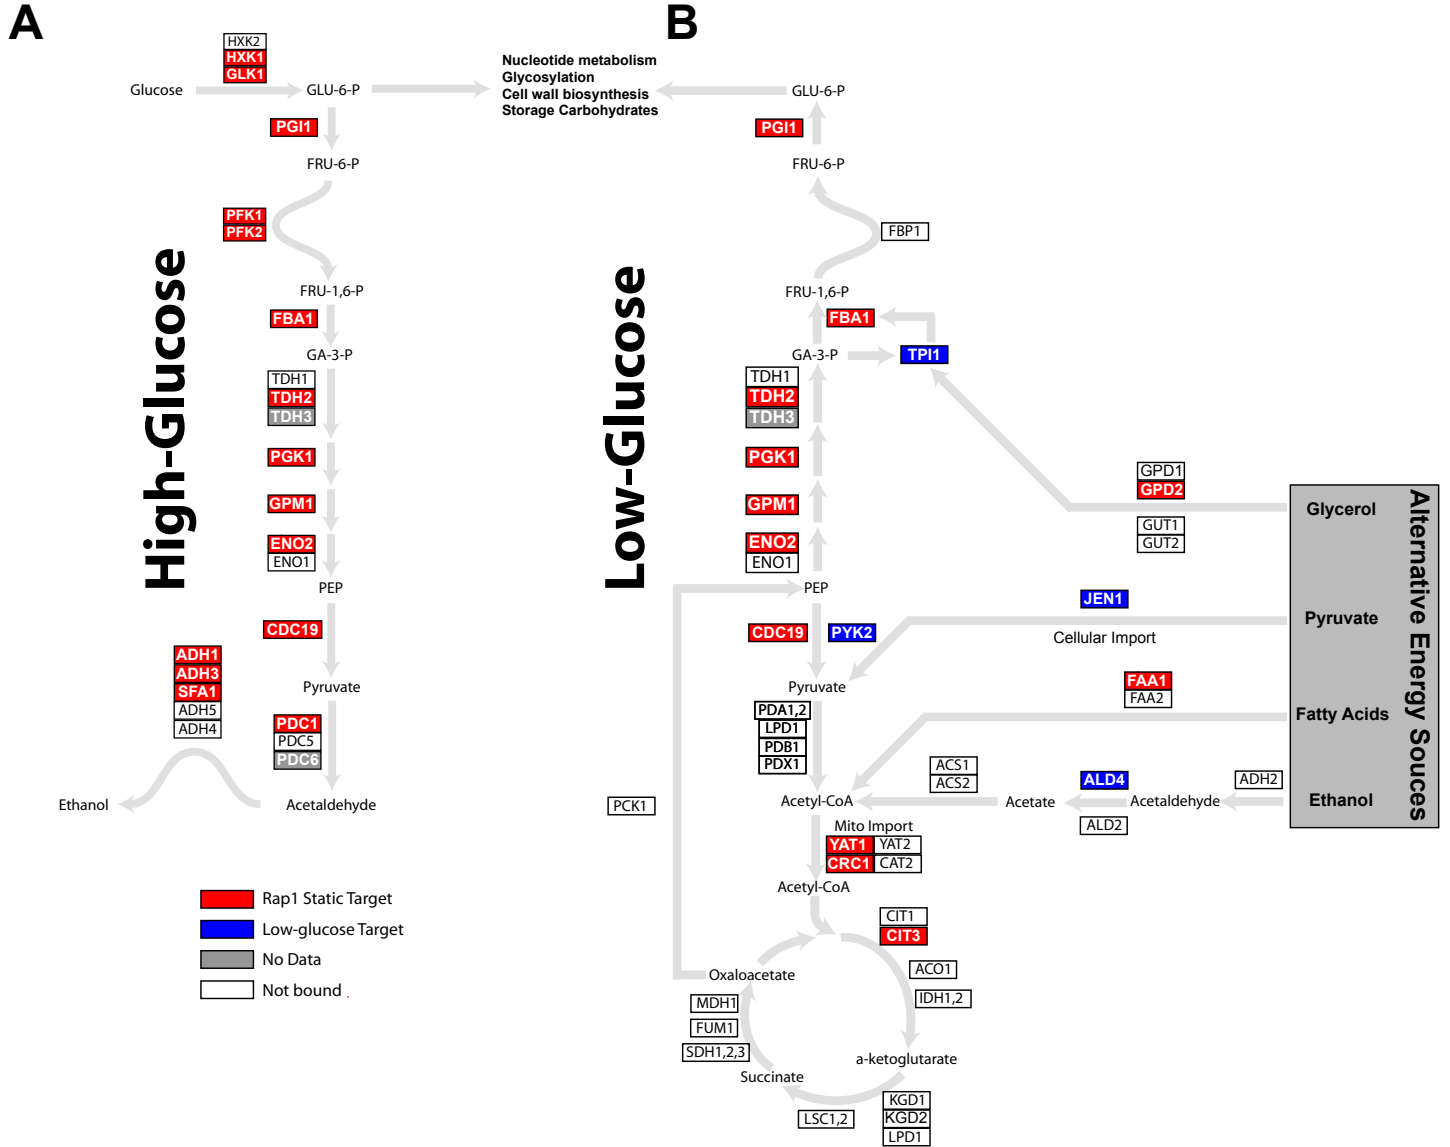



**Supplemental Table 1.** Experiments performed.

| Experiment Number | Array Name | Growth Condition                    | Protein of interest | Strain               | IP Tech  |
|-------------------|------------|-------------------------------------|---------------------|----------------------|----------|
| 1                 | PM028I     | YPD Exponential Growth (OD 0.6-1.0) | Rap1                | BY4741 Rap1-Tap      | TAP-Tag  |
| 2                 | PM029I     | YPD Exponential Growth (OD 0.6-1.0) | Rap1                | BY4741 Rap1-Tap      | TAP-Tag  |
| 3                 | BR046C     | YPD Exponential Growth (OD 0.6-1.0) | Rap1                | BY4741 Rap1-Tap      | TAP-Tag  |
| 4                 | BR083C     | YPD Exponential Growth (OD 0.6-1.0) | Rap1                | BY4741 Rap1-Tap      | TAP-Tag  |
| 5                 | BR111C     | YPD Exponential Growth (OD 0.6-1.0) | Rap1                | BY4741 Rap1-Tap      | TAP-Tag  |
| 6                 | BR136C     | YPD Exponential Growth (OD 0.6-1.0) | Rap1                | BY4741 Rap1-Tap      | TAP-Tag  |
| 7                 | BR047C     | YPD Exponential Growth (OD 0.6-1.0) | Rap1                | BY4741 Rap1-Tap      | TAP-Tag  |
| 8                 | BR095C     | YPD Exponential Growth (OD 0.6-1.0) | Rap1                | BY4741 Rap1-Tap      | TAP-Tag  |
| 9                 | BR107C     | YPD 24hrs                           | Rap1                | BY4741 Rap1-Tap      | TAP-Tag  |
| 10                | BR104C     | YPD 24hrs                           | Rap1                | BY4741 Rap1-Tap      | TAP-Tag  |
| 11                | PM032I     | YPD 24hrs                           | Rap1                | BY4741 Rap1-Tap      | TAP-Tag  |
| 12                | PM118I     | YPD 24hrs                           | Rap1                | BY4741 Rap1-Tap      | TAP-Tag  |
| 13                | PM119I     | YPD 24hrs                           | Rap1                | BY4741 Rap1-Tap      | TAP-Tag  |
| 14                | BR251C     | YPD 24hrs                           | Rap1                | BY4741 Rap1-Tap      | TAP-Tag  |
| 15                | BR089C     | YPD 72 hrs                          | Rap1                | BY4741 Rap1-Tap      | TAP-Tag  |
| 16                | PM121I     | YPD 72 hrs                          | Rap1                | BY4741 Rap1-Tap      | TAP-Tag  |
| 17                | BR088C     | YPD 72 hrs                          | Rap1                | BY4741 Rap1-Tap      | TAP-Tag  |
| 18                | BR206C     | YPD 72 hrs                          | Rap1                | BY4741 Rap1-Tap      | TAP-Tag  |
| 19                | PM023I     | YPD 72 hrs                          | Rap1                | BY4741 Rap1-Tap      | TAP-Tag  |
| 20                | PM025I     | YPD 72 hrs                          | Rap1                | BY4741 Rap1-Tap      | TAP-Tag  |
| 21                | BR145C     | YPD 72 hrs                          | Rap1                | BY4741 Rap1-Tap      | TAP-Tag  |
| 22                | BR103C     | YPD 168 hrs                         | Rap1                | BY4741 Rap1-Tap      | TAP-Tag  |
| 23                | PM031I     | YPD 168 hrs                         | Rap1                | BY4741 Rap1-Tap      | TAP-Tag  |
| 24                | PM120I     | YPD 168 hrs                         | Rap1                | BY4741 Rap1-Tap      | TAP-Tag  |
| 25                | BR244C     | YPD 168 hrs                         | Rap1                | BY4741 Rap1-Tap      | TAP-Tag  |
| 26                | BR250C     | YPD 168 hrs                         | Rap1                | BY4741 Rap1-Tap      | TAP-Tag  |
| 27                | BR102C     | YPD 336 hrs                         | Rap1                | BY4741 Rap1-Tap      | TAP-Tag  |
| 28                | PM030I     | YPD 336 hrs                         | Rap1                | BY4741 Rap1-Tap      | TAP-Tag  |
| 29                | BR144C     | YPD 336 hrs                         | Rap1                | BY4741 Rap1-Tap      | TAP-Tag  |
| 30                | PM073I     | YPD 336 hrs                         | Rap1                | BY4741 Rap1-Tap      | TAP-Tag  |
| 31                | PM074I     | YPD 504 hrs                         | Rap1                | BY4741 Rap1-Tap      | TAP-Tag  |
| 32                | BR142C     | YPD 504 hrs                         | Rap1                | BY4741 Rap1-Tap      | TAP-Tag  |
| 33                | BR108C     | YPD Exponential Growth (OD 0.6-1.0) | Mock                | BY4741               | TAP-Tag  |
| 34                | BR246C     | YPD Exponential Growth (OD 0.6-1.0) | Mock                | BY4741               | TAP-Tag  |
| 35                | BR153C     | YPD 24hrs                           | Mock                | BY4741               | TAP-Tag  |
| 36                | PM099I     | YPD 24hrs                           | Mock                | BY4741               | TAP-Tag  |
| 37                | BR053C     | YPD 72 hrs                          | Mock                | BY4741               | TAP-Tag  |
| 38                | PM097I     | YPD 72 hrs                          | Mock                | BY4741               | TAP-Tag  |
| 39                | BR151C     | YPD 168 hrs                         | Mock                | BY4741               | TAP-Tag  |
| 40                | PM096I     | YPD 168 hrs                         | Mock                | BY4741               | TAP-Tag  |
| 41                | GSM050     | YPD Exponential Growth (OD 0.6-1.0) | Rap1                | BY4741               | AB Y-300 |
| 42                | PM093I     | YPD Exponential Growth (OD 0.6-1.0) | Rap1                | BY4741               | AB Y-300 |
| 43                | PM122I     | YPD Exponential Growth (OD 0.6-1.0) | Rap1                | BY4741               | AB Y-300 |
| 44                | PM110C     | YPD Exponential Growth (OD 0.6-1.0) | Rap1                | BY4741 <i>sut1</i> Δ | AB Y-300 |
| 45                | PM109C     | YPD Exponential Growth (OD 0.6-1.0) | Rap1                | BY4741 <i>sut1</i> Δ | AB Y-300 |
| 46                | GSM047     | YPD Exponential Growth (OD 0.6-1.0) | Rap1                | BY4741 <i>sut1</i> Δ | AB Y-300 |
| 47                | PM111I     | YPD 24hrs                           | Rap1                | BY4741 <i>sut1</i> Δ | AB Y-300 |
| 48                | PM112I     | YPD 24hrs                           | Rap1                | BY4741 <i>sut1</i> Δ | AB Y-300 |
| 49                | PM113I     | YPD 72 hrs                          | Rap1                | BY4741 <i>sut1</i> Δ | AB Y-300 |
| 50                | PM114I     | YPD Exponential Growth (OD 0.6-1.0) | Rap1                | BY4741 <i>mig1</i> Δ | AB Y-300 |
| 51                | PM115I     | YPD Exponential Growth (OD 0.6-1.0) | Rap1                | BY4741 <i>mig1</i> Δ | AB Y-300 |
| 52                | PM116I     | YPD Exponential Growth (OD 0.6-1.0) | Rap1                | BY4741 <i>mig1</i> Δ | AB Y-300 |

|     |             |                                         |            |                      |          |
|-----|-------------|-----------------------------------------|------------|----------------------|----------|
| 53  | BR190C      | YPD Exponential Growth (OD 0.6-1.0)     | Rap1       | BY4741 <i>nrg1</i> Δ | AB Y-300 |
| 54  | GSM254      | YPD Exponential Growth (OD 0.6-1.0)     | Rap1       | BY4741 <i>nrg1</i> Δ | AB Y-300 |
| 55  | GSM049      | YPD Exponential Growth (OD 0.6-1.0)     | Rap1       | BY4741 <i>nrg1</i> Δ | AB Y-300 |
| 56  | GSM216      | YPD Exponential Growth (OD 0.6-1.0)     | Rap1       | BY4741 <i>sko1</i> Δ | AB Y-300 |
| 57  | GSM217      | YPD Exponential Growth (OD 0.6-1.0)     | Rap1       | BY4741 <i>sko1</i> Δ | AB Y-300 |
| 58  | GSM226      | YPD Exponential Growth (OD 0.6-1.0)     | Rap1       | BY4741 <i>sko1</i> Δ | AB Y-300 |
| 59  | GSM099      | YPD Exponential Growth (OD 0.6-1.0)     | Rap1       | BY4741 <i>dot6</i> Δ | AB Y-300 |
| 60  | BR061C      | YPD Exponential Growth (OD 0.6-1.0)     | Rap1       | BY4741 <i>dot6</i> Δ | AB Y-300 |
| 61  | GSM101      | YPD Exponential Growth (OD 0.6-1.0)     | Rap1       | BY4741 <i>dot6</i> Δ | AB Y-300 |
| 62  | GSM195      | YPD Exponential Growth (OD 0.6-1.0)     | Rap1       | BY4741 <i>dot6</i> Δ | AB Y-300 |
| 63  | GSM230      | YPD Exponential Growth (OD 0.6-1.0)     | Rap1       | BY4741 <i>gat1</i> Δ | AB Y-300 |
| 64  | GSM098      | YPD Exponential Growth (OD 0.6-1.0)     | Rap1       | BY4741 <i>gat1</i> Δ | AB Y-300 |
| 65  | GSM048      | YPD Exponential Growth (OD 0.6-1.0)     | Rap1       | BY4741 <i>gat1</i> Δ | AB Y-300 |
| 66  | BR101C      | YPD Exponential Growth (OD 0.6-1.0)     | Rap1       | BY4741 <i>tup1</i> Δ | AB Y-300 |
| 67  | BR198C      | YPD Exponential Growth (OD 0.6-1.0)     | Rap1       | BY4741 <i>tup1</i> Δ | AB Y-300 |
| 68  | GSM196      | YPD Exponential Growth (OD 0.6-1.0)     | Rap1       | BY4741 <i>tup1</i> Δ | AB Y-300 |
| 69  | GSM201      | YPD Exponential Growth (OD 0.6-1.0)     | Rap1       | BY4741 <i>tup1</i> Δ | AB Y-300 |
| 70  | BR195C      | YPD Exponential Growth (OD 0.6-1.0)     | Rap1       | BY4741 <i>tup1</i> Δ | AB Y-300 |
| 71  | GSM148      | YPD Exponential Growth (OD 0.6-1.0)     | Rap1       | BY4741 <i>isw2</i> Δ | AB Y-300 |
| 72  | GSM149      | YPD Exponential Growth (OD 0.6-1.0)     | Rap1       | BY4741 <i>isw2</i> Δ | AB Y-300 |
| 73  | GSM100      | YPD Exponential Growth (OD 0.6-1.0)     | Rap1       | BY4741 <i>isw2</i> Δ | AB Y-300 |
| 74  | GSM151      | YPD Exponential Growth (OD 0.6-1.0)     | Rap1       | BY4741 <i>hda1</i> Δ | AB Y-300 |
| 75  | GSM198      | YPD Exponential Growth (OD 0.6-1.0)     | Rap1       | BY4741 <i>hda1</i> Δ | AB Y-300 |
| 76  | BR062C      | YPD Exponential Growth (OD 0.6-1.0)     | Rap1       | BY4741 <i>hda1</i> Δ | AB Y-300 |
| 77  | GSM102      | YPD Exponential Growth (OD 0.6-1.0)     | Rap1       | BY4741 <i>hda1</i> Δ | AB Y-300 |
| 78  | GSM152      | YPD Exponential Growth (OD 0.6-1.0)     | Tup1       | BY4741 Tup1-Tap      | TAP-Tag  |
| 79  | GSM154      | YPD Exponential Growth (OD 0.6-1.0)     | Tup1       | BY4741 Tup1-Tap      | TAP-Tag  |
| 80  | BR063C      | YPD Exponential Growth (OD 0.6-1.0)     | Tup1       | BY4741 Tup1-Tap      | TAP-Tag  |
| 81  | GSM155      | YPD Exponential Growth (OD 0.6-1.0)     | Tup1       | BY4741 Tup1-Tap      | TAP-Tag  |
| 82  | YOI-N-174   | YPD Exponential Growth (OD 0.6-1.0)     | Tup1       | BY4741 Tup1-Tap      | TAP-Tag  |
| 83  | YOI-N-185   | YPD Exponential Growth (OD 0.6-1.0)     | Tup1       | BY4741 Tup1-Tap      | TAP-Tag  |
| 84  | YOI-N-183   | YPD Exponential Growth (OD 0.6-1.0)     | Tup1       | BY4741 Tup1-Tap      | TAP-Tag  |
| 85  | YOI-N-191   | YPD Exponential Growth (OD 0.6-1.0)     | Tup1       | BY4741 Tup1-Tap      | TAP-Tag  |
| 86  | BR060C      | YPD 72 hrs                              | Tup1       | BY4741 Tup1-Tap      | TAP-Tag  |
| 87  | GSM104      | YPD 72 hrs                              | Tup1       | BY4741 Tup1-Tap      | TAP-Tag  |
| 88  | YOI-N-173   | YPD 72 hrs                              | Tup1       | BY4741 Tup1-Tap      | TAP-Tag  |
| 89  | GSM146      | YPD 72 hrs                              | Tup1       | BY4741 Tup1-Tap      | TAP-Tag  |
| 90  | YOI-N-219   | YPD 72 hrs                              | Tup1       | BY4741 Tup1-Tap      | TAP-Tag  |
| 91  | YOI-N-220   | YPD 72 hrs                              | Tup1       | BY4741 Tup1-Tap      | TAP-Tag  |
| 92  | YOI-N-192   | YPD Exponential Growth (OD 0.6-1.0)     | Histone H3 | BY4741               | AB H3    |
| 93  | YOI-N-134   | YPD Exponential Growth (OD 0.6-1.0)     | Histone H3 | BY4741               | AB H3    |
| 94  | YOI-N-202   | YPD Exponential Growth (OD 0.6-1.0)     | Histone H3 | BY4741               | AB H3    |
| 95  | YOI-N-193   | YPD 72 hrs                              | Histone H3 | BY4741               | AB H3    |
| 96  | YOI-N-138   | YPD 72 hrs                              | Histone H3 | BY4741               | AB H3    |
| 97  | YOI-N-201   | YPD 72 hrs                              | Histone H3 | BY4741               | AB H3    |
| 98  | YOI-N-136   | YP EtOH Exponential Growth (OD 0.6-1.0) | Rap1       | BY4741               | AB Y-300 |
| 99  | YOI-N-117   | YP EtOH Exponential Growth (OD 0.6-1.0) | Rap1       | BY4741               | AB Y-300 |
| 100 | YOI-N-141   | YP EtOH Exponential Growth (OD 0.6-1.0) | Rap1       | BY4741               | AB Y-300 |
| 101 | YOI-N-119   | YP EtOH Exponential Growth (OD 0.6-1.0) | Rap1       | BY4741               | AB Y-300 |
| 102 | BR059C      | YPD Exponential Growth (OD 0.6-1.0)     | Sut1       | BY4741 Sut1-Tap      | TAP-Tag  |
| 103 | YOI-N-089   | YPD Exponential Growth (OD 0.6-1.0)     | Sut1       | BY4741 Sut1-Tap      | TAP-Tag  |
| 104 | YOI-N-075   | YPD Exponential Growth (OD 0.6-1.0)     | Sut1       | BY4741 Sut1-Tap      | TAP-Tag  |
| 105 | YOI-N-200   | YPD Exponential Growth (OD 0.6-1.0)     | Sut1       | BY4741 Sut1-Tap      | TAP-Tag  |
| 106 | BR100C      | YPD 72 hrs                              | Sut1       | BY4741 Sut1-Tap      | TAP-Tag  |
| 107 | JDL_g_024_1 | YPD Exponential Growth (OD 0.6-1.0)     | Rap1       | S288C                | AB       |

|     |                                                |      |       |    |
|-----|------------------------------------------------|------|-------|----|
| 108 | JDL_g_109_IYPD Exponential Growth (OD 0.6-1.0) | Rap1 | S288C | AB |
| 109 | JDL_g_124_IYPD Exponential Growth (OD 0.6-1.0) | Rap1 | S288C | AB |
| 110 | JDL_g_128_IYPD Exponential Growth (OD 0.6-1.0) | Rap1 | S288C | AB |
| 111 | JDL_g_132_IYPD Exponential Growth (OD 0.6-1.0) | Rap1 | S288C | AB |
| 112 | JDL_g_084_IYPD 24hrs                           | Rap1 | S288C | AB |
| 113 | JDL_g_095_IYPD 24hrs                           | Rap1 | S288C | AB |
| 114 | JDL_g_093_IYPD 72 hrs                          | Rap1 | S288C | AB |
| 115 | JDL_g_096_IYPD 72 hrs                          | Rap1 | S288C | AB |
| 116 | JDL_g_125_IYPD 336 hrs                         | Rap1 | S288C | AB |
| 117 | JDL_g_126_IYPD 336 hrs                         | Rap1 | S288C | AB |
