# Supplementary material
Source: PubMed Central journal article supplement (PMC2756100)
Supplement: NIHMS104742-supplement-All_supplementary_figures.pdf [file NIHMS104742-supplement-All_supplementary_figures.pdf]

# A

## Rap1 protein levels decrease upon glucose depletion

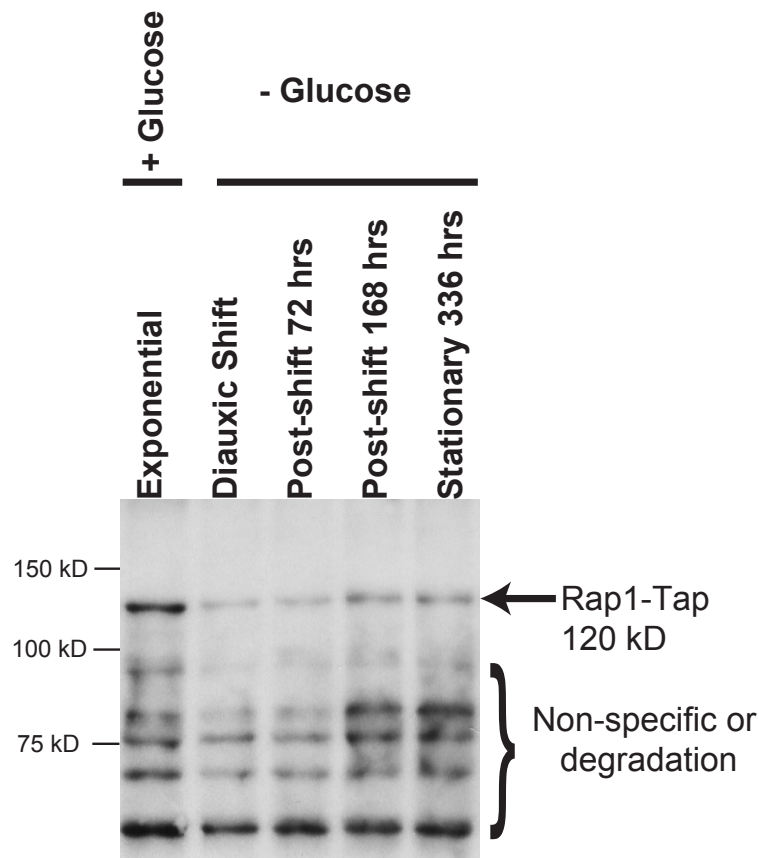

# B

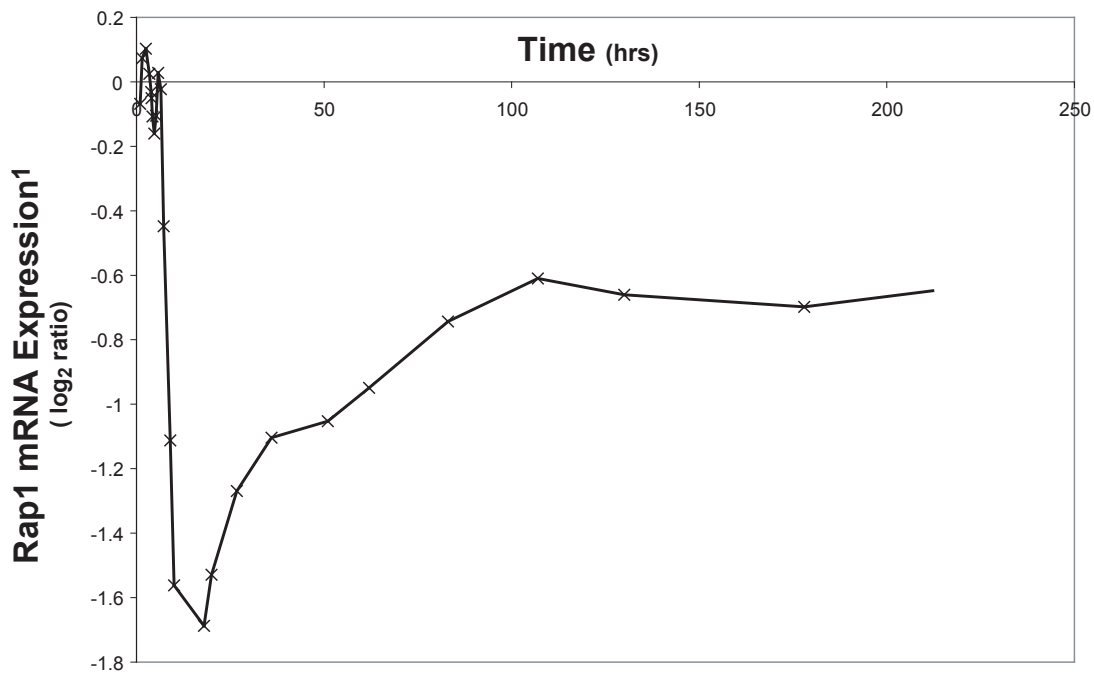

**Supplementary Figure 1. Rap1 protein and mRNA levels decrease as glucose is depleted.**

**A)** 20  $\mu$ g of whole-cell extract was separated by a 12% SDS-PAGE gel and probed with anti-Rap1 antibody. **B)** mRNA levels for Rap1, as measured by microarray<sup>1</sup>, decrease upon diauxic shift.

<sup>1</sup>Radonjic, M. et al. Genome-wide analyses reveal RNA polymerase II located upstream of genes poised for rapid response upon *S. cerevisiae* stationary phase exit. *Mol Cell* 18, 171-83 (2005).

**A**

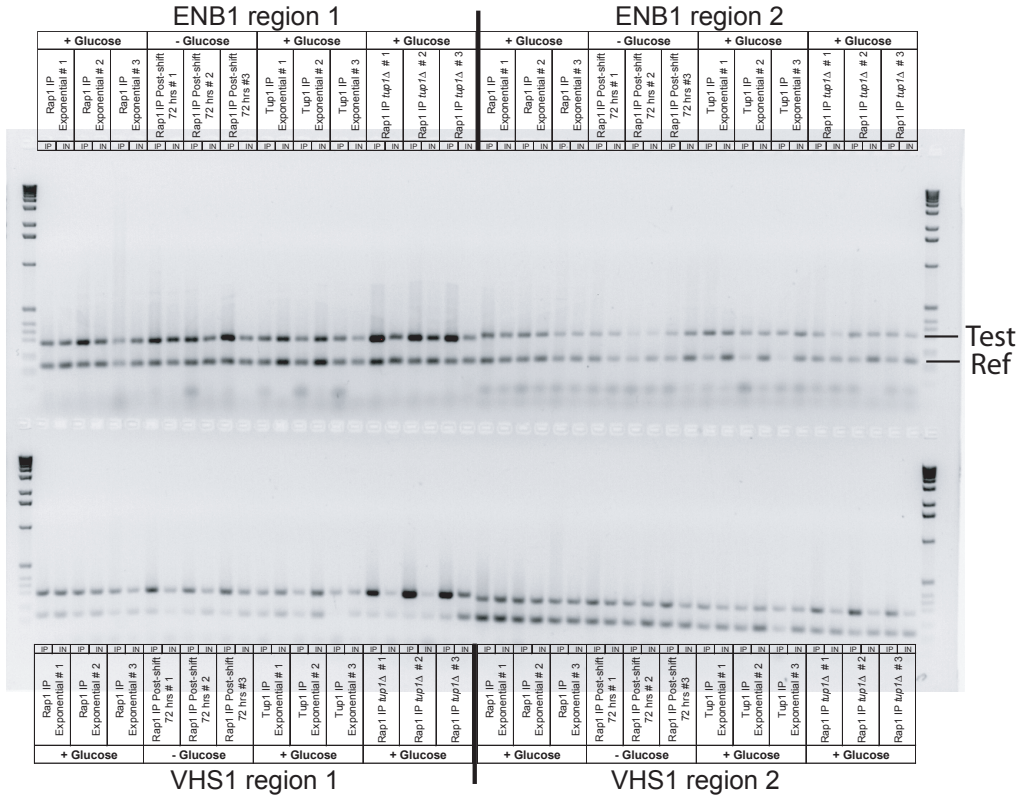

**B**

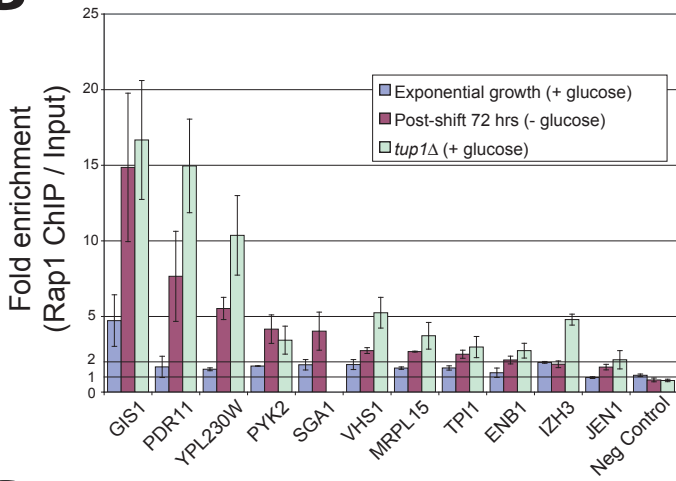

**C**

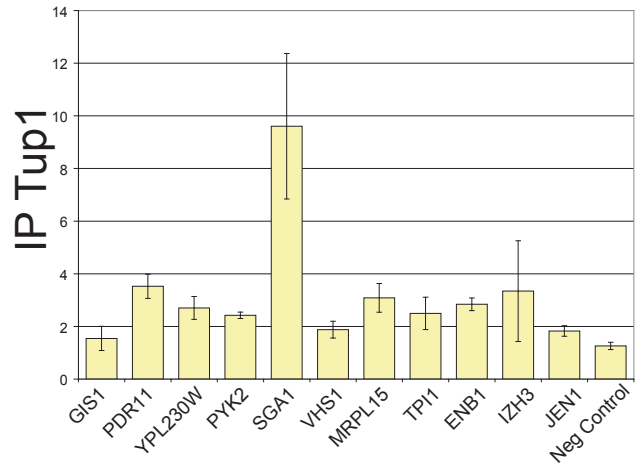

**D**

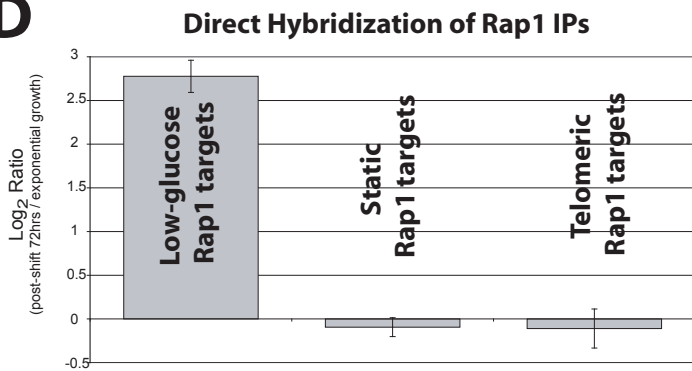

**Supplementary Figure 2. Confirmation of ChIP-chip results.** **A)** Representative agarose gel image of ChIP-PCR results, showing results from two genomic regions upstream of ENB1 and VHS1. ChIP (IP) samples are loaded next to their corresponding input (IN). The top band in every lane is the test fragment, and the bottom band is specific to a control (YHR131C). **B)** The average ratio (IP/Input) for Rap1 IPs, during exponential growth, after depletion of glucose (72 hrs), and in a *tup1*Δ background, is plotted with their standard error at 11 loci. The ratio for any site is determined by the (intensity of the test fragment in IP / intensity of the control fragment in IP) / (intensity of the test fragment in input / intensity of the control fragment in input). **C)** The average ratio (IP/Input) for Tup1 IPs is plotted with their standard error at 11 loci. **D)** Two biological replicates of Rap1 ChIPs after glucose depletion (72 hrs) were hybridized directly on the same microarray with Rap1 ChIPs from cells grown in high glucose. The average ratios reported from probes representing the 52 low-glucose Rap1 targets, 262 static Rap1 targets, and telomeric targets is plotted, along with their standard errors.

Supplementary Figure 3. Buck and Lieb

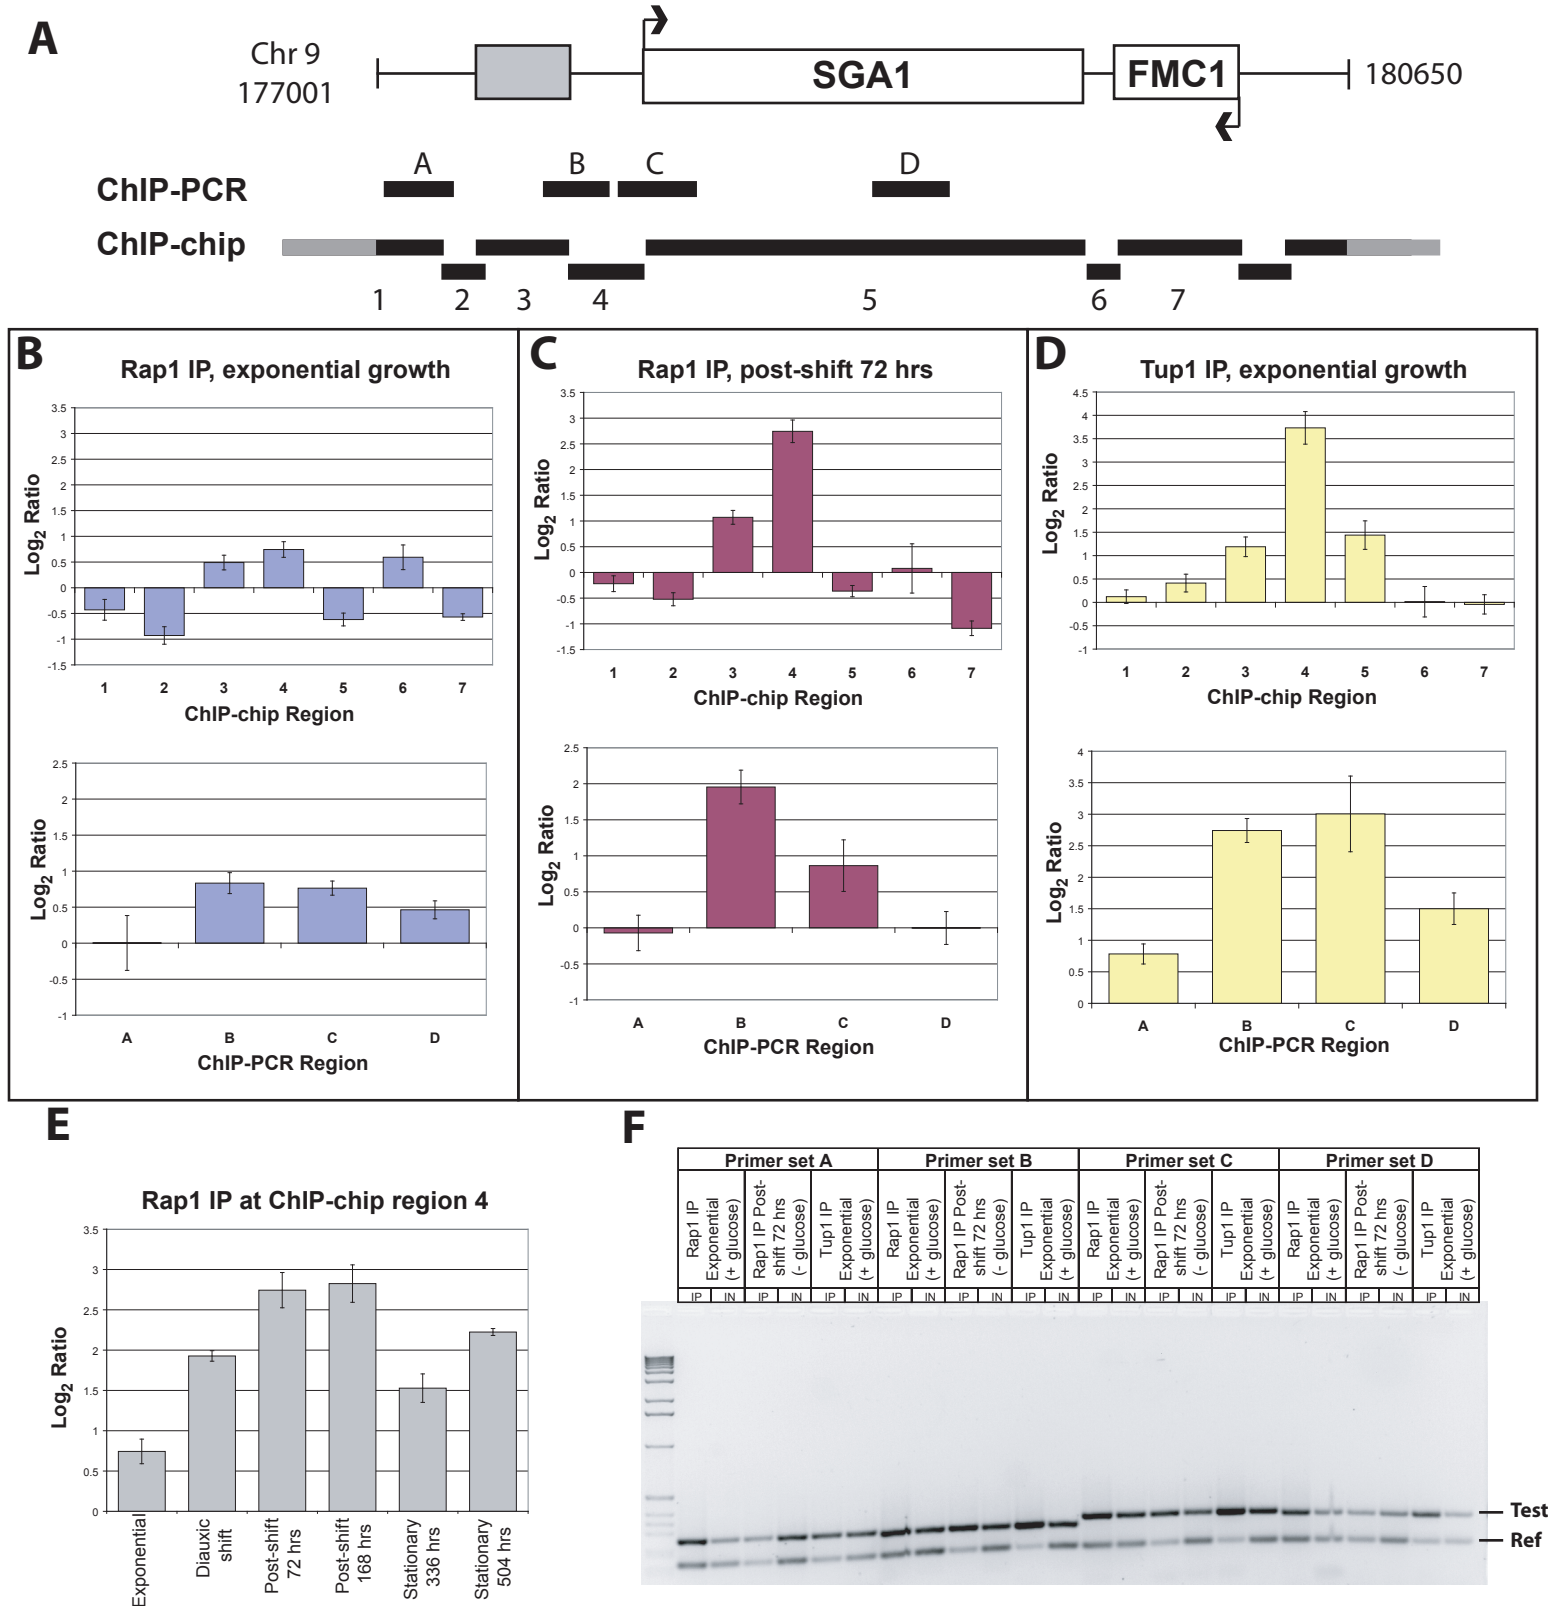

**Supplementary Figure 3. Confirmation of ChIP-chip results at the SGA1 locus.**

**A)** The open reading frames for SGA1 and FMC1 are shown. An upstream dubious open reading frame is shaded grey. Arrows indicate direction of transcription. The regions tested by ChIP-PCR (A-D) and the elements on the microarray (1-7) are shown below. **B)** Rap1 IPs during exponential growth (+ glucose) as measured by the microarray (top; 8 replicates) and PCR (bottom; 4 replicates). **C)** Rap1 IPs in low glucose (72 hrs) as measured by the microarray (top; 7 replicates) and PCR (bottom; 4 replicates). **D)** Tup1 IPs during exponential growth (+ glucose) as measured by microarray (top; 8 replicate) and PCR (bottom; 3 replicates). **E)** The enrichment at microarray element 4 is shown for the entire timecourse. **F)** A representative gel image for one replicate at each PCR region. IP (IP) samples are loaded next to their corresponding input (IN). The top band in every lane is the test fragment, which is compared to the bottom control band (YHR131C).

**A**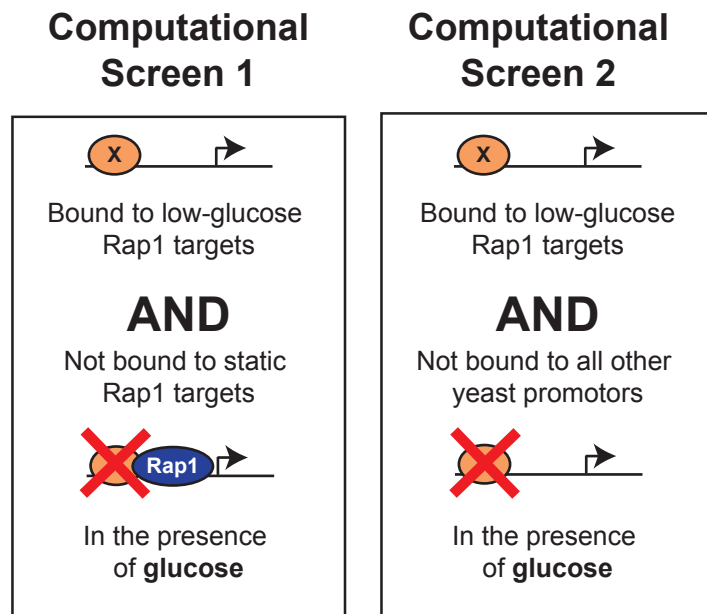**B**

**Computational Screen 1**

|             | Description                                         | r       |
|-------------|-----------------------------------------------------|---------|
| <b>Mig1</b> | <b>Tup1 associated factor</b><br>Glucose metabolism | 0.25 ** |
| <b>Sut1</b> | <b>Tup1 associated factor</b><br>Sterol transport   | 0.23 ** |
| <b>Gat1</b> | Regulation of nitrogen utilization                  | 0.23 ** |
| <b>Nrg1</b> | <b>Tup1 associated factor</b><br>Glucose metabolism | 0.23 ** |
| <b>Dot6</b> | Chromatin silencing at telomere                     | 0.22 ** |

**Computational Screen 2**

|             | Description                                                           | r       |
|-------------|-----------------------------------------------------------------------|---------|
| <b>Sut1</b> | <b>Tup1 associated factor</b><br>Sterol transport                     | 0.14 ** |
| <b>Swi4</b> | G1/S transition of mitotic cell cycle                                 | 0.09 ** |
| <b>Nrg1</b> | <b>Tup1 associated factor</b><br>Glucose metabolism                   | 0.09 ** |
| <b>Phd1</b> | Pseudohyphal growth                                                   | 0.09 ** |
| <b>Sko1</b> | <b>Tup1 associated factor</b><br>Negative regulation of transcription | 0.07 *  |

\*\* p &lt; 0.00001; \* p &lt; 0.0001

**Supplementary Figure 4. Computational screens predict the involvement of Tup1-Ssn6 proteins in blocking Rap1 binding.** **A)** Schematic representation of two computational screens for effectors of Rap1 conditional binding. Screen 1 compares low-glucose targets versus static targets and screen 2 compares low-glucose targets versus all yeast intergenic regions. Individual variables best separating the two groups were identified using discriminant analysis with stepwise variable selection. The genomic dataset analyzed contained published ChIP-chip data for 205 transcription factors<sup>1</sup>, protein-binding microarray data<sup>2</sup>, nucleosome occupancy<sup>3</sup>, histone methylation<sup>4</sup>, and GC content. **B)** Results for the two computational screens listed by Pearson correlation (r) to the classifier variable. The p-value was estimated by 10,000 permutations. The GO biological process is listed for each protein (lower row). The variables selected were from ChIP-chip experiments<sup>1</sup> except for Mig1 which was from protein-binding microarray data<sup>2</sup>.

<sup>1</sup> Harbison, C.T. et al. Transcriptional regulatory code of a eukaryotic genome. Nature 431, 99-104 (2004).

<sup>2</sup> Mukherjee, S. et al. Rapid analysis of the DNA-binding specificities of transcription factors with DNA microarrays. Nat Genet 36, 1331-9 (2004).

<sup>3</sup> Rao, B., Shibata, Y., Strahl, B.D. & Lieb, J.D. Dimethylation of histone H3 at lysine 36 demarcates regulatory and nonregulatory chromatin genome-wide. Mol Cell Biol 25, 9447-59 (2005).

<sup>4</sup> Lee, C.K., Shibata, Y., Rao, B., Strahl, B.D. & Lieb, J.D. Evidence for nucleosome depletion at active regulatory regions genome-wide. Nat Genet 36, 900-5 (2004).

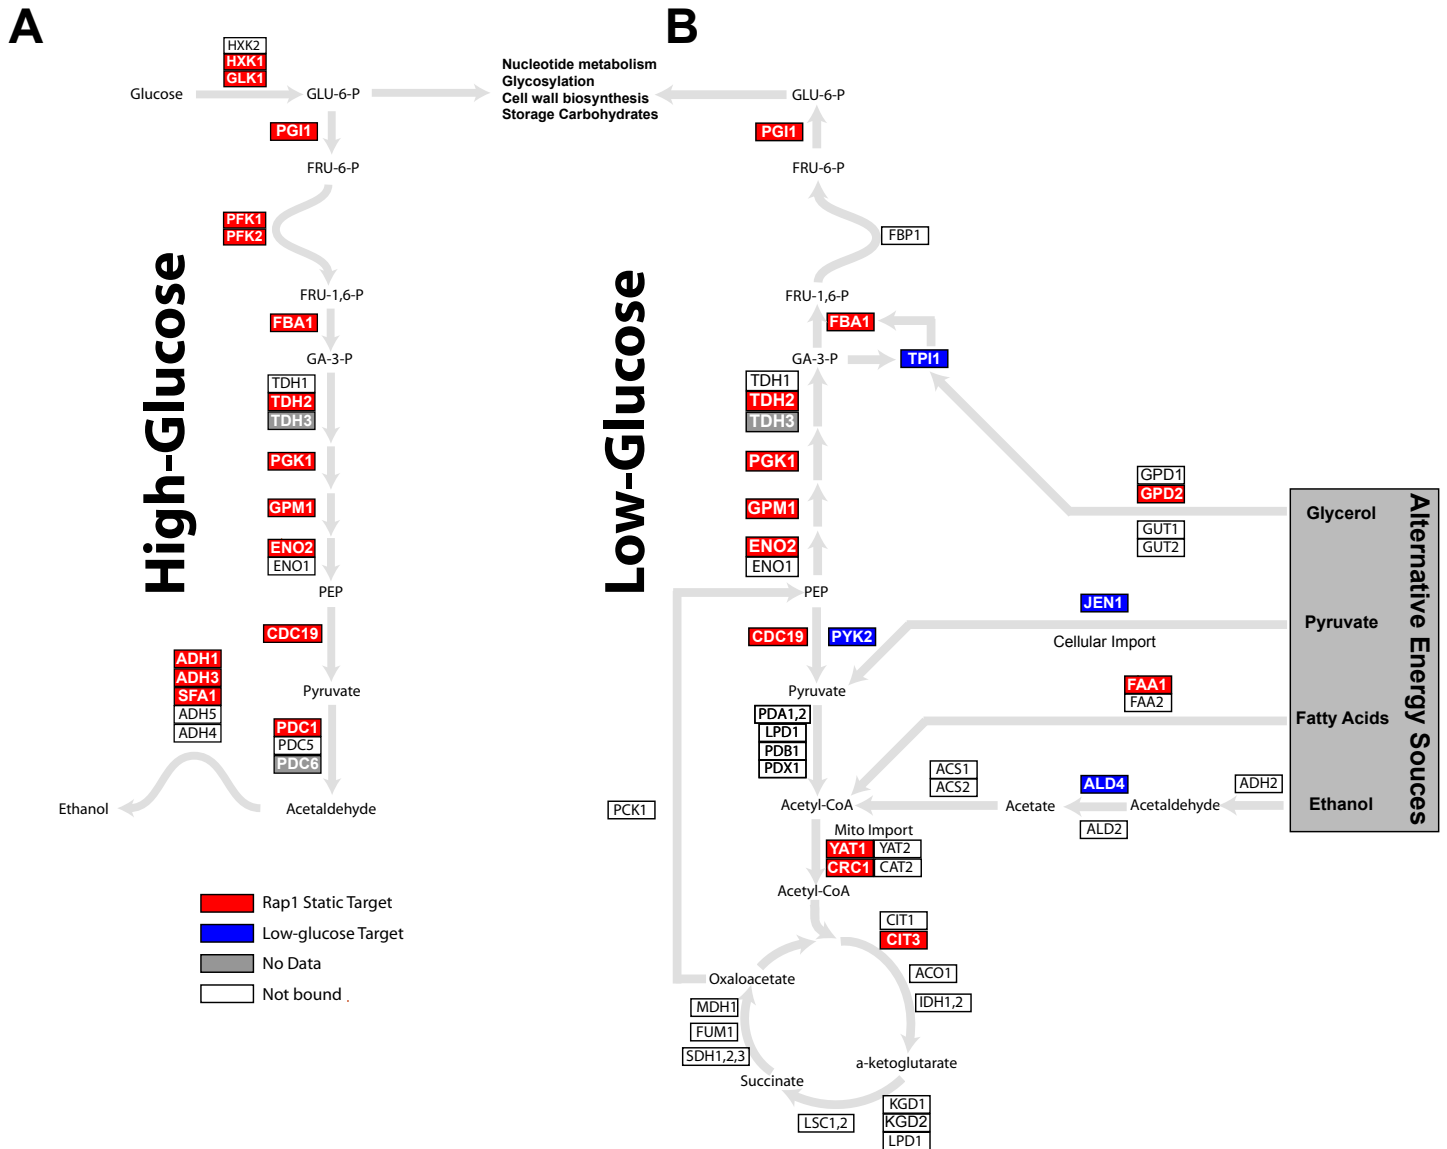

**Supplementary Figure 5. Rap1 binding and glycolysis**

**A)** Rap1 binds upstream of at least one enzyme involved in each of the eleven steps required to metabolize glucose into ethanol. Static Rap1 targets are shown in red and low-glucose targets are in blue. Arrows indicate the flow of substrate. **B)** During growth in low-glucose, Rap1 binds upstream of genes involved in alternative carbon-source utilization.

**Supplemental Table 1. Summary of all ChIP-chip experiments performed.**

| Experiment Number | Array Name | Growth Condition                    | Protein of interest | Strain                       | IP Tech  |
|-------------------|------------|-------------------------------------|---------------------|------------------------------|----------|
| 1                 | PM028I     | YPD Exponential Growth (OD 0.6-1.0) | Rap1                | BY4741 Rap1-TAP <sup>1</sup> | TAP-Tag  |
| 2                 | PM029I     | YPD Exponential Growth (OD 0.6-1.0) | Rap1                | BY4741 Rap1-TAP <sup>1</sup> | TAP-Tag  |
| 3                 | BR046C     | YPD Exponential Growth (OD 0.6-1.0) | Rap1                | BY4741 Rap1-TAP <sup>1</sup> | TAP-Tag  |
| 4                 | BR083C     | YPD Exponential Growth (OD 0.6-1.0) | Rap1                | BY4741 Rap1-TAP <sup>1</sup> | TAP-Tag  |
| 5                 | BR111C     | YPD Exponential Growth (OD 0.6-1.0) | Rap1                | BY4741 Rap1-TAP <sup>1</sup> | TAP-Tag  |
| 6                 | BR136C     | YPD Exponential Growth (OD 0.6-1.0) | Rap1                | BY4741 Rap1-TAP <sup>1</sup> | TAP-Tag  |
| 7                 | BR047C     | YPD Exponential Growth (OD 0.6-1.0) | Rap1                | BY4741 Rap1-TAP <sup>1</sup> | TAP-Tag  |
| 8                 | BR095C     | YPD Exponential Growth (OD 0.6-1.0) | Rap1                | BY4741 Rap1-TAP <sup>1</sup> | TAP-Tag  |
| 9                 | BR107C     | YPD 24hrs                           | Rap1                | BY4741 Rap1-TAP <sup>1</sup> | TAP-Tag  |
| 10                | BR104C     | YPD 24hrs                           | Rap1                | BY4741 Rap1-TAP <sup>1</sup> | TAP-Tag  |
| 11                | PM032I     | YPD 24hrs                           | Rap1                | BY4741 Rap1-TAP <sup>1</sup> | TAP-Tag  |
| 12                | PM118I     | YPD 24hrs                           | Rap1                | BY4741 Rap1-TAP <sup>1</sup> | TAP-Tag  |
| 13                | PM119I     | YPD 24hrs                           | Rap1                | BY4741 Rap1-TAP <sup>1</sup> | TAP-Tag  |
| 14                | BR251C     | YPD 24hrs                           | Rap1                | BY4741 Rap1-TAP <sup>1</sup> | TAP-Tag  |
| 15                | BR089C     | YPD 72 hrs                          | Rap1                | BY4741 Rap1-TAP <sup>1</sup> | TAP-Tag  |
| 16                | PM121I     | YPD 72 hrs                          | Rap1                | BY4741 Rap1-TAP <sup>1</sup> | TAP-Tag  |
| 17                | BR088C     | YPD 72 hrs                          | Rap1                | BY4741 Rap1-TAP <sup>1</sup> | TAP-Tag  |
| 18                | BR206C     | YPD 72 hrs                          | Rap1                | BY4741 Rap1-TAP <sup>1</sup> | TAP-Tag  |
| 19                | PM023I     | YPD 72 hrs                          | Rap1                | BY4741 Rap1-TAP <sup>1</sup> | TAP-Tag  |
| 20                | PM025I     | YPD 72 hrs                          | Rap1                | BY4741 Rap1-TAP <sup>1</sup> | TAP-Tag  |
| 21                | BR145C     | YPD 72 hrs                          | Rap1                | BY4741 Rap1-TAP <sup>1</sup> | TAP-Tag  |
| 22                | BR103C     | YPD 168 hrs                         | Rap1                | BY4741 Rap1-TAP <sup>1</sup> | TAP-Tag  |
| 23                | PM031I     | YPD 168 hrs                         | Rap1                | BY4741 Rap1-TAP <sup>1</sup> | TAP-Tag  |
| 24                | PM120I     | YPD 168 hrs                         | Rap1                | BY4741 Rap1-TAP <sup>1</sup> | TAP-Tag  |
| 25                | BR244C     | YPD 168 hrs                         | Rap1                | BY4741 Rap1-TAP <sup>1</sup> | TAP-Tag  |
| 26                | BR250C     | YPD 168 hrs                         | Rap1                | BY4741 Rap1-TAP <sup>1</sup> | TAP-Tag  |
| 27                | BR102C     | YPD 336 hrs                         | Rap1                | BY4741 Rap1-TAP <sup>1</sup> | TAP-Tag  |
| 28                | PM030I     | YPD 336 hrs                         | Rap1                | BY4741 Rap1-TAP <sup>1</sup> | TAP-Tag  |
| 29                | BR144C     | YPD 336 hrs                         | Rap1                | BY4741 Rap1-TAP <sup>1</sup> | TAP-Tag  |
| 30                | PM073I     | YPD 336 hrs                         | Rap1                | BY4741 Rap1-TAP <sup>1</sup> | TAP-Tag  |
| 31                | PM074I     | YPD 504 hrs                         | Rap1                | BY4741 Rap1-TAP <sup>1</sup> | TAP-Tag  |
| 32                | BR142C     | YPD 504 hrs                         | Rap1                | BY4741 Rap1-TAP <sup>1</sup> | TAP-Tag  |
| 33                | BR108C     | YPD Exponential Growth (OD 0.6-1.0) | Mock                | BY4741                       | TAP-Tag  |
| 34                | BR246C     | YPD Exponential Growth (OD 0.6-1.0) | Mock                | BY4741                       | TAP-Tag  |
| 35                | BR153C     | YPD 24hrs                           | Mock                | BY4741                       | TAP-Tag  |
| 36                | PM099I     | YPD 24hrs                           | Mock                | BY4741                       | TAP-Tag  |
| 37                | BR053C     | YPD 72 hrs                          | Mock                | BY4741                       | TAP-Tag  |
| 38                | PM097I     | YPD 72 hrs                          | Mock                | BY4741                       | TAP-Tag  |
| 39                | BR151C     | YPD 168 hrs                         | Mock                | BY4741                       | TAP-Tag  |
| 40                | PM096I     | YPD 168 hrs                         | Mock                | BY4741                       | TAP-Tag  |
| 41                | GSM050     | YPD Exponential Growth (OD 0.6-1.0) | Rap1                | BY4741                       | AB Y-300 |
| 42                | PM093I     | YPD Exponential Growth (OD 0.6-1.0) | Rap1                | BY4741                       | AB Y-300 |
| 43                | PM122I     | YPD Exponential Growth (OD 0.6-1.0) | Rap1                | BY4741                       | AB Y-300 |
| 44                | PM110C     | YPD Exponential Growth (OD 0.6-1.0) | Rap1                | BY4741 <i>sut 1</i> Δ        | AB Y-300 |
| 45                | PM109C     | YPD Exponential Growth (OD 0.6-1.0) | Rap1                | BY4741 <i>sut 1</i> Δ        | AB Y-300 |
| 46                | GSM047     | YPD Exponential Growth (OD 0.6-1.0) | Rap1                | BY4741 <i>sut 1</i> Δ        | AB Y-300 |
| 47                | PM111I     | YPD 24hrs                           | Rap1                | BY4741 <i>sut 1</i> Δ        | AB Y-300 |
| 48                | PM112I     | YPD 24hrs                           | Rap1                | BY4741 <i>sut 1</i> Δ        | AB Y-300 |

|     |           |                                         |            |                              |          |
|-----|-----------|-----------------------------------------|------------|------------------------------|----------|
| 49  | PM1131    | YPD 72 hrs                              | Rap1       | BY4741 <i>sut1</i> Δ         | AB Y-300 |
| 50  | PM1141    | YPD Exponential Growth (OD 0.6-1.0)     | Rap1       | BY4741 <i>mig1</i> Δ         | AB Y-300 |
| 51  | PM1151    | YPD Exponential Growth (OD 0.6-1.0)     | Rap1       | BY4741 <i>mig1</i> Δ         | AB Y-300 |
| 52  | PM1161    | YPD Exponential Growth (OD 0.6-1.0)     | Rap1       | BY4741 <i>mig1</i> Δ         | AB Y-300 |
| 53  | BR190C    | YPD Exponential Growth (OD 0.6-1.0)     | Rap1       | BY4741 <i>nrg1</i> Δ         | AB Y-300 |
| 54  | GSM254    | YPD Exponential Growth (OD 0.6-1.0)     | Rap1       | BY4741 <i>nrg1</i> Δ         | AB Y-300 |
| 55  | GSM049    | YPD Exponential Growth (OD 0.6-1.0)     | Rap1       | BY4741 <i>nrg1</i> Δ         | AB Y-300 |
| 56  | GSM216    | YPD Exponential Growth (OD 0.6-1.0)     | Rap1       | BY4741 <i>sko1</i> Δ         | AB Y-300 |
| 57  | GSM217    | YPD Exponential Growth (OD 0.6-1.0)     | Rap1       | BY4741 <i>sko1</i> Δ         | AB Y-300 |
| 58  | GSM226    | YPD Exponential Growth (OD 0.6-1.0)     | Rap1       | BY4741 <i>sko1</i> Δ         | AB Y-300 |
| 59  | GSM099    | YPD Exponential Growth (OD 0.6-1.0)     | Rap1       | BY4741 <i>dot6</i> Δ         | AB Y-300 |
| 60  | BR061C    | YPD Exponential Growth (OD 0.6-1.0)     | Rap1       | BY4741 <i>dot6</i> Δ         | AB Y-300 |
| 61  | GSM101    | YPD Exponential Growth (OD 0.6-1.0)     | Rap1       | BY4741 <i>dot6</i> Δ         | AB Y-300 |
| 62  | GSM195    | YPD Exponential Growth (OD 0.6-1.0)     | Rap1       | BY4741 <i>dot6</i> Δ         | AB Y-300 |
| 63  | GSM230    | YPD Exponential Growth (OD 0.6-1.0)     | Rap1       | BY4741 <i>gat1</i> Δ         | AB Y-300 |
| 64  | GSM098    | YPD Exponential Growth (OD 0.6-1.0)     | Rap1       | BY4741 <i>gat1</i> Δ         | AB Y-300 |
| 65  | GSM048    | YPD Exponential Growth (OD 0.6-1.0)     | Rap1       | BY4741 <i>gat1</i> Δ         | AB Y-300 |
| 66  | BR101C    | YPD Exponential Growth (OD 0.6-1.0)     | Rap1       | BY4741 <i>tup1</i> Δ         | AB Y-300 |
| 67  | BR198C    | YPD Exponential Growth (OD 0.6-1.0)     | Rap1       | BY4741 <i>tup1</i> Δ         | AB Y-300 |
| 68  | GSM196    | YPD Exponential Growth (OD 0.6-1.0)     | Rap1       | BY4741 <i>tup1</i> Δ         | AB Y-300 |
| 69  | GSM201    | YPD Exponential Growth (OD 0.6-1.0)     | Rap1       | BY4741 <i>tup1</i> Δ         | AB Y-300 |
| 70  | BR195C    | YPD Exponential Growth (OD 0.6-1.0)     | Rap1       | BY4741 <i>tup1</i> Δ         | AB Y-300 |
| 71  | GSM148    | YPD Exponential Growth (OD 0.6-1.0)     | Rap1       | BY4741 <i>isw2</i> Δ         | AB Y-300 |
| 72  | GSM149    | YPD Exponential Growth (OD 0.6-1.0)     | Rap1       | BY4741 <i>isw2</i> Δ         | AB Y-300 |
| 73  | GSM100    | YPD Exponential Growth (OD 0.6-1.0)     | Rap1       | BY4741 <i>isw2</i> Δ         | AB Y-300 |
| 74  | GSM151    | YPD Exponential Growth (OD 0.6-1.0)     | Rap1       | BY4741 <i>hda1</i> Δ         | AB Y-300 |
| 75  | GSM198    | YPD Exponential Growth (OD 0.6-1.0)     | Rap1       | BY4741 <i>hda1</i> Δ         | AB Y-300 |
| 76  | BR062C    | YPD Exponential Growth (OD 0.6-1.0)     | Rap1       | BY4741 <i>hda1</i> Δ         | AB Y-300 |
| 77  | GSM102    | YPD Exponential Growth (OD 0.6-1.0)     | Rap1       | BY4741 <i>hda1</i> Δ         | AB Y-300 |
| 78  | GSM152    | YPD Exponential Growth (OD 0.6-1.0)     | Tup1       | BY4741 Tup1-TAP <sup>1</sup> | TAP-Tag  |
| 79  | GSM154    | YPD Exponential Growth (OD 0.6-1.0)     | Tup1       | BY4741 Tup1-TAP <sup>1</sup> | TAP-Tag  |
| 80  | BR063C    | YPD Exponential Growth (OD 0.6-1.0)     | Tup1       | BY4741 Tup1-TAP <sup>1</sup> | TAP-Tag  |
| 81  | GSM155    | YPD Exponential Growth (OD 0.6-1.0)     | Tup1       | BY4741 Tup1-TAP <sup>1</sup> | TAP-Tag  |
| 82  | YOI-N-174 | YPD Exponential Growth (OD 0.6-1.0)     | Tup1       | BY4741 Tup1-TAP <sup>1</sup> | TAP-Tag  |
| 83  | YOI-N-185 | YPD Exponential Growth (OD 0.6-1.0)     | Tup1       | BY4741 Tup1-TAP <sup>1</sup> | TAP-Tag  |
| 84  | YOI-N-183 | YPD Exponential Growth (OD 0.6-1.0)     | Tup1       | BY4741 Tup1-TAP <sup>1</sup> | TAP-Tag  |
| 85  | YOI-N-191 | YPD Exponential Growth (OD 0.6-1.0)     | Tup1       | BY4741 Tup1-TAP <sup>1</sup> | TAP-Tag  |
| 86  | BR060C    | YPD 72 hrs                              | Tup1       | BY4741 Tup1-TAP <sup>1</sup> | TAP-Tag  |
| 87  | GSM104    | YPD 72 hrs                              | Tup1       | BY4741 Tup1-TAP <sup>1</sup> | TAP-Tag  |
| 88  | YOI-N-173 | YPD 72 hrs                              | Tup1       | BY4741 Tup1-TAP <sup>1</sup> | TAP-Tag  |
| 89  | GSM146    | YPD 72 hrs                              | Tup1       | BY4741 Tup1-TAP <sup>1</sup> | TAP-Tag  |
| 90  | YOI-N-219 | YPD 72 hrs                              | Tup1       | BY4741 Tup1-TAP <sup>1</sup> | TAP-Tag  |
| 91  | YOI-N-220 | YPD 72 hrs                              | Tup1       | BY4741 Tup1-TAP <sup>1</sup> | TAP-Tag  |
| 92  | YOI-N-192 | YPD Exponential Growth (OD 0.6-1.0)     | Histone H3 | BY4741                       | AB H3    |
| 93  | YOI-N-134 | YPD Exponential Growth (OD 0.6-1.0)     | Histone H3 | BY4741                       | AB H3    |
| 94  | YOI-N-202 | YPD Exponential Growth (OD 0.6-1.0)     | Histone H3 | BY4741                       | AB H3    |
| 95  | YOI-N-193 | YPD 72 hrs                              | Histone H3 | BY4741                       | AB H3    |
| 96  | YOI-N-138 | YPD 72 hrs                              | Histone H3 | BY4741                       | AB H3    |
| 97  | YOI-N-201 | YPD 72 hrs                              | Histone H3 | BY4741                       | AB H3    |
| 98  | YOI-N-136 | YP EtOH Exponential Growth (OD 0.6-1.0) | Rap1       | BY4741                       | AB Y-300 |
| 99  | YOI-N-117 | YP EtOH Exponential Growth (OD 0.6-1.0) | Rap1       | BY4741                       | AB Y-300 |
| 100 | YOI-N-141 | YP EtOH Exponential Growth (OD 0.6-1.0) | Rap1       | BY4741                       | AB Y-300 |
| 101 | YOI-N-119 | YP EtOH Exponential Growth (OD 0.6-1.0) | Rap1       | BY4741                       | AB Y-300 |

|     |            |                                     |      |                              |         |
|-----|------------|-------------------------------------|------|------------------------------|---------|
| 102 | BR059C     | YPD Exponential Growth (OD 0.6-1.0) | Sut1 | BY4741 Sut1-TAP <sup>1</sup> | TAP-Tag |
| 103 | YOI-N-089  | YPD Exponential Growth (OD 0.6-1.0) | Sut1 | BY4741 Sut1-TAP <sup>1</sup> | TAP-Tag |
| 104 | YOI-N-075  | YPD Exponential Growth (OD 0.6-1.0) | Sut1 | BY4741 Sut1-TAP <sup>1</sup> | TAP-Tag |
| 105 | YOI-N-200  | YPD Exponential Growth (OD 0.6-1.0) | Sut1 | BY4741 Sut1-TAP <sup>1</sup> | TAP-Tag |
| 106 | BR100C     | YPD 72 hrs                          | Sut1 | BY4741 Sut1-TAP <sup>1</sup> | TAP-Tag |
| 107 | JDL_g_024_ | YPD Exponential Growth (OD 0.6-1.0) | Rap1 | S288C                        | AB      |
| 108 | JDL_g_109_ | YPD Exponential Growth (OD 0.6-1.0) | Rap1 | S288C                        | AB      |
| 109 | JDL_g_124_ | YPD Exponential Growth (OD 0.6-1.0) | Rap1 | S288C                        | AB      |
| 110 | JDL_g_128_ | YPD Exponential Growth (OD 0.6-1.0) | Rap1 | S288C                        | AB      |
| 111 | JDL_g_132_ | YPD Exponential Growth (OD 0.6-1.0) | Rap1 | S288C                        | AB      |
| 112 | JDL_g_084_ | YPD 24hrs                           | Rap1 | S288C                        | AB      |
| 113 | JDL_g_095_ | YPD 24hrs                           | Rap1 | S288C                        | AB      |
| 114 | JDL_g_093_ | YPD 72 hrs                          | Rap1 | S288C                        | AB      |
| 115 | JDL_g_096_ | YPD 72 hrs                          | Rap1 | S288C                        | AB      |
| 116 | JDL_g_125_ | YPD 336 hrs                         | Rap1 | S288C                        | AB      |
| 117 | JDL_g_126_ | YPD 336 hrs                         | Rap1 | S288C                        | AB      |

<sup>1</sup>Ghaemmaghami, S. et al. Global analysis of protein expression in yeast. Nature 425, 737-41 (2003).



| Rap1 Target Type | Center of Binding | Downstream ORF 1 | Gene Name 1 | Downstream ORF 2 | Gene Name 2 | Notes |
|------------------|-------------------|------------------|-------------|------------------|-------------|-------|
| Low-Glucose      | iYAL003W          | YAL002W          | VPS8        |                  |             |       |
| Low-Glucose      | iYBL050W          | YBL049W          |             | YBL048W          |             |       |
| Low-Glucose      | iYBR090C          | YBR090C          |             | YBR089C-A        |             |       |
| Low-Glucose      | iYBR105C          | YBR106W          | PHO88       | YBR105C          | VID24       |       |
| Low-Glucose      | iYBR202W          | YBR203W          |             |                  |             |       |
| Low-Glucose      | YCL018W           | YCL018W          | LEU2        |                  |             | 2     |
| Low-Glucose      | iYCR006C          | YCR006C          |             | YCR005C          | CIT2        |       |
| Low-Glucose      | iYDR050C          | YDR050C          | TPI1        |                  |             |       |
| Low-Glucose      | iYDR061W          | YDR062W          | LCB2        |                  |             |       |
| Low-Glucose      | YDR094W           | YDR096W          | GIS1        |                  |             | 1     |
| Low-Glucose      | iYDR246W          | YDR247W          |             |                  |             |       |
| Low-Glucose      | iYDR258C          | YDR258C          | HSP78       |                  |             |       |
| Low-Glucose      | iYDR387C          | YDR388W          | RVS167      | YDR387C          |             |       |
| Low-Glucose      | iYDR487C          | YDR487C          | RIB3        | YDR486C          | VPS60       |       |
| Low-Glucose      | iYEL028W          | tM(CAU)E         |             |                  |             |       |
| Low-Glucose      | YER092W           | YER091C          | MET6        |                  |             | 1     |
| Low-Glucose      | iYER145C          | YER145C          | FTR1        | YER146W          | LSM5        |       |
| Low-Glucose      | YFLWTAU1          |                  |             |                  |             |       |
| Low-Glucose      | iYFR017C          | YFR017C          |             |                  |             |       |
| Low-Glucose      | iYFR033C          | YFR033C          | QCR6        |                  |             |       |
| Low-Glucose      | iYGL121C          | YGL121C          |             | YGL122C          | NAB2        |       |
| Low-Glucose      | iYGL097W-0        | YGL096W          | TOS8        |                  |             |       |
| Low-Glucose      | iYGR091W          | YGR092W          | DBF2        |                  |             |       |
| Low-Glucose      | iYGRCDelta25      | YGR144W          | THI4        |                  |             |       |
| Low-Glucose      | iYGR233C-0        | YGR233C          | PHO81       | YGR234W          | YHB1        |       |
| Low-Glucose      | iYiL119C-1        | YiL118W          | RHO3        | YiL119C          | RPI1        |       |
| Low-Glucose      | iYiL100W          | YiL099W          | SGA1        | YiL101C          | XBP1        |       |
| Low-Glucose      | iYiL013C          | YiL013C          | PDR11       | YiL012W          |             |       |
| Low-Glucose      | iYiL009C-A        | YiL009C-A        | EST3        |                  |             |       |
| Low-Glucose      | YJL084C           | YJL083W          |             | YJL084C          |             | 1, 2  |
| Low-Glucose      | iYJL079C          | YJL079C          | PRY1        |                  |             |       |
| Low-Glucose      | iYKL218C-2        | YKL217W          | JEN1        |                  |             |       |
| Low-Glucose      | iYLR023C          | YLR023C          |             |                  |             |       |
| Low-Glucose      | YLR141W           | YLR142w          | PUT1        | YLR139c          | SLS1        | 1     |
| Low-Glucose      | YLR173W           | YLR172C          | DPH5        | YLR174W          | IDP2        | 1     |
| Low-Glucose      | iYLR312C          | YLR312W-A        | MRPL15      | YLR312C          |             |       |
| Low-Glucose      | YML122C           | YML123C          | PHO84       | YML121W          | GTR1        | 1     |
| Low-Glucose      | iYMR016C-1        | YMR017W          | SPO20       | YMR016C          | SOK2        |       |
| Low-Glucose      | YMR069W           | YMR070W          | MOT3        |                  |             | 1     |
| Low-Glucose      | iYMR086C-A        | YMR086C-A        |             | YMR087W          |             |       |
| Low-Glucose      | iYMRWDelta15      | YMR107W          |             |                  |             |       |
| Low-Glucose      | YNL028W           | YNL029C          | KTR5        | YNL027W          | CRZ1        | 1     |
| Low-Glucose      | iYOL158C          | YOL158C          | ENB1        |                  |             |       |
| Low-Glucose      | iYOR178C-0        | YOR178C          | GAC1        |                  |             |       |
| Low-Glucose      | iYOR268C          | YOR268C          |             | YOR269W          | PAC1        |       |
| Low-Glucose      | YOR318C           | YOR319W          | HSH49       |                  |             | 1     |
| Low-Glucose      | YOR348C           | YOR347C          | PYK2        | YOR348C          | PUT4        | 1, 2  |
| Low-Glucose      | iYPL231W          | YPL230W          | USV1        |                  |             |       |
| Low-Glucose      | YPL056C           | YPL057C          | SUR1        |                  |             | 1     |

|             |            |           |        |           |        |      |
|-------------|------------|-----------|--------|-----------|--------|------|
| Low-Glucose | iYPL055C   | YPL054W   | LEE1   | YPL055C   |        |      |
| Low-Glucose | YPL025C    | YPL026C   | SHA3   | YPL024W   | NCE4   | 1    |
| Low-Glucose | iYPR191W   | YPR192W   | AQY1   |           |        |      |
| Static      | YLR400W    | YLR399C   | BDF1   | YLR400W   |        | 1, 2 |
| Static      | iYLR390W   | YLR390W-A |        | YLR389C   | STE23  |      |
| Static      | iYJL028W   | YJL026W   | RNR2   | YJL027C   |        |      |
| Static      | iYGL116W   | YGL115W   | SNF4   |           |        |      |
| Static      | YOR343C    | YOR342C   |        |           |        |      |
| Static      | YCR025C    | YCR025C   |        | YCR024C-A | PMP1   | 1, 2 |
| Static      | iYMR013C-0 | YMR013C   | SEC59  |           |        |      |
| Static      | iYAL034C   |           |        |           |        |      |
| Static      | iYPL162C   | YPL162C   |        |           |        |      |
| Static      | iYiL019W   | YiL018W   | RPL2B  |           |        |      |
| Static      | YLR402W    | YLR401C   |        | YLR403W   | SFP1   | 1    |
| Static      | YEL008W    | YEL009C   | GCN4   | YEL007W   | TOS9   | 1    |
| Static      | iYGL075C   | YGL075C   | MPS2   | YGL073W   | HSF1   | 3    |
| Static      | iYDL192W   | YDL191W   | RPL35A |           |        |      |
| Static      | iYBR047W   | YBR048W   | RPS11B |           |        |      |
| Static      | YOR235w    | snR17a    |        | YOR234C   | RPL33B | 1    |
| Static      | iYDR186C   | YDR186C   |        | YDR188W   | CCT6   |      |
| Static      | iYJR139C   | YJR139C   | HOM6   |           |        |      |
| Static      | iYPR079W   | YPR080W   | TEF1   |           |        |      |
| Static      | YEL035C    | YEL036C   | ANP1   | YEL034W   | HYP2   | 1    |
| Static      | iYNL329C   | YNL329C   | PEX6   |           |        |      |
| Static      | iYBL022C   | YBL022C   | PIM1   |           |        |      |
| Static      | iYJL192C   | YJL191W   | RPS14B | YJL192C   |        |      |
| Static      | iYDR276C   | YDR276C   | PMP3   |           |        |      |
| Static      | iYiL052C   | YiL052C   | RPL34B |           |        |      |
| Static      | iLSR1      |           |        |           |        |      |
| Static      | iYDR416W   | YDR418W   | RPL12B |           |        |      |
| Static      | iYDL130W-A | YDL130W   | RPP1B  |           |        |      |
| Static      | iYOR292C   | YOR293W   | RPS10A | YOR292C   |        |      |
| Static      | iYPL145C   | YPL144W   |        | YPL145C   | KES1   |      |
| Static      | iYPR102C   | YPR103W   | PRE2   | YPR102C   | RPL11A |      |
| Static      | iYER031C   | YER031C   | YPT31  | YER032W   | FIR1   |      |
| Static      | iYDL137W   | YDL136W   | RPL35B |           |        |      |
| Static      | iYLR044C   | YLR044C   | PDC1   |           |        |      |
| Static      | iYOL110W   | YOL109W   | ZEO1   |           |        |      |
| Static      | iYiL055C   | YiL055C   |        | YiL054W   | FYV2   |      |
| Static      | iYLR286C   | YLR286C   | CTS1   |           |        |      |
| Static      | iYDR063W   | YDR064W   | RPS13  |           |        |      |
| Static      | YPL080C    | YPL079W   | RPL21B |           |        | 1    |
| Static      | iYEL054C   | YEL054C   | RPL12A |           |        |      |
| Static      | iYCL037C   | YCL037C   | SRO9   | YCL036W   |        |      |
| Static      | iYJR058C   | YJR059W   | PTK2   | YJR058C   | APS2   |      |
| Static      | iYML064C   | YML063W   | RPS1B  | YML064C   | TEM1   |      |
| Static      | iYBL087C   | YBL087C   | RPL23A |           |        |      |
| Static      | iYDR392W   | YDR393W   | SHE9   |           |        |      |
| Static      | iYNL302C   | YNL302C   | RPS19B |           |        |      |
| Static      | iYDL188C   | YDL188C   | PPH22  | YDL186W   |        |      |
| Static      | iYOL121C   | YOL121C   | RPS19A |           |        |      |
| Static      | iYEL073C-4 |           |        |           |        |      |

|        |            |           |        |         |        |      |  |
|--------|------------|-----------|--------|---------|--------|------|--|
| Static | iYOL083W-1 | YOL082W   | CVT19  |         |        |      |  |
| Static | iYLR437C   | YLR437C   |        | YLR438W | CAR2   |      |  |
| Static | iYiR015W   | YiR016W   |        |         |        |      |  |
| Static | iYPL221W   | YPL220W   | RPL1A  | YPL219W | PCL8   |      |  |
| Static | iYPL017C   | YPL017C   |        | YPL016W | SWI1   |      |  |
| Static | iTA(AGC)D  | YDL022W   | GPD1   | YDL024C | DIA3   |      |  |
| Static | iYLR441C   | YLR441C   | RPS1A  |         |        |      |  |
| Static | iYLL066C-1 | YLL065W   | GIN11  | YLL066C |        |      |  |
| Static | iYGR085C   | YGR085C   | RPL11B |         |        |      |  |
| Static | iYDR036C   | YDR036C   |        | YDR037W | KRS1   |      |  |
| Static | iYMR193W   | YMR194W   | RPL36A |         |        |      |  |
| Static | iYDL083C   | YDL082W   | RPL13A | YDL083C | RPS16B |      |  |
| Static | iYOR161C   | YOR161C   |        |         |        |      |  |
| Static | iYNL289W-1 | YNL288W   | CAF40  |         |        |      |  |
| Static | iYJL136C   | YJL136C   | RPS21B | YJL135W |        |      |  |
| Static | iYOL060C   | YOL059W   | GPD2   | YOL060C | AMI3   |      |  |
| Static | iYJR122W   | YJR123W   | RPS5   |         |        |      |  |
| Static | YOR183W    | YOR182c   | RPS30B | YOR184W | SER1   | 1    |  |
| Static | iYHR009C   | YHR010W   | RPL27A | YHR009C |        |      |  |
| Static | iYFR031C-A | YFR031C-A | RPL2A  |         |        |      |  |
| Static | iYML025C   | YML025C   |        | YML024W | RPS17A |      |  |
| Static | iYDR449C   | YDR450W   | RPS18A | YDR449C |        |      |  |
| Static | iYBR084C-A | YBR084C-A | RPL19A | YBR085W | AAC3   |      |  |
| Static | YLR003C    | YLR003C   |        |         |        | 2    |  |
| Static | iYHR203C   | YHR203C   | RPS4B  | YHR204W | HTM1   |      |  |
| Static | iYDR300C   | YDR301W   | CFT1   | YDR300C | PRO1   |      |  |
| Static | iYGL136C   | YGL136C   |        | YGL135W | RPL1B  |      |  |
| Static | iYER073W   | YER074W   | RPS24A |         |        |      |  |
| Static | iYPR161C   | YPR161C   | SGV1   |         |        |      |  |
| Static | iYiL133C   | YiL133C   | RPL16A |         |        |      |  |
| Static | iYMR142C   | YMR143W   | RPS16A | YMR142C | RPL13B |      |  |
| Static | iYLR047C   | YLR048W   | RPS0B  | YLR047C |        |      |  |
| Static | iYLR452C   | YLR452C   | SST2   |         |        |      |  |
| Static | iYBR189W   | YBR191W   | RPL21A | YBR190W |        |      |  |
| Static | iYER116C   | YER117W   | RPL23B | YER116C | SLX8   |      |  |
| Static | iYNL154C   | YNL154C   | YCK2   | YNL152W |        |      |  |
| Static | iYPL249C-A |           |        |         |        |      |  |
| Static | iYJL190C   | YJL190C   | RPS22A | YJL189W | RPL39  |      |  |
| Static | iYDL184C   | YDL184C   | RPL41A |         |        |      |  |
| Static | iYGL104C   | YGL103W   | RPL28  | YGL104C |        |      |  |
| Static | iYPL090C   | YPL090C   | RPS6A  |         |        |      |  |
| Static | iYPR131C   | YPR131C   | NAT3   | YPR132W | RPS23B |      |  |
| Static | iYPL082C   | YPL081W   | RPS9A  | YPL082C | MOT1   |      |  |
| Static | iTR(CCG)L  | YLR344W   | RPL26A |         |        |      |  |
| Static | iYCL067C   | YCL066W   |        | YCL067C |        |      |  |
| Static | YLR112W    | YLR110C   | CCW12  | YLR113W | HOG1   | 1, 3 |  |
| Static | iYBL093C   | YBL092W   | RPL32  | YBL093C | ROX3   |      |  |
| Static | YGL007W    | YGL008C   | PMA1   |         |        | 1    |  |
| Static | iYDR500C   | YDR501W   | PLM2   | YDR500C | RPL37B |      |  |
| Static | iYOL040C   | YOL040C   | RPS15  | YOL039W | RPP2A  |      |  |
| Static | iYKL176C   | YKL175W   | ZRT3   | YKL176C | LST4   |      |  |
| Static | iYMR229C   | YMR230W   | RPS10B | YMR229C | RRP5   |      |  |

|        |            |           |        |         |        |      |
|--------|------------|-----------|--------|---------|--------|------|
| Static | iYMR230W   | YMR231W   | PEP5   |         |        |      |
| Static | iYGL124C   | YGL124C   | MON1   | YGL123W | RPS2   |      |
| Static | iYOL136C   | YOL136C   | PFK27  | YOL133W | HRT1   |      |
| Static | iYDR470C   | YDR470C   | UGO1   | YDR471W | RPL27B |      |
| Static | iYNL069C   | YNL069C   | RPL16B |         |        |      |
| Static | iYHL002W   | YHL001W   | RPL14B |         |        |      |
| Static | iYNL011C   | YNL010W   |        | YNL011C |        |      |
| Static | iYOR387C-0 | YOR387C   |        |         |        |      |
| Static | iYMR015C   | YMR015C   | ERG5   |         |        |      |
| Static | YKL097C    | YKL096W-A |        |         |        | 1    |
| Static | iYCR039C   | YCR040W   | ALPHA1 | YCR039C | ALPHA2 |      |
| Static | iYOR100C   | YOR101W   | RAS1   | YOR100C | CRC1   |      |
| Static | iYJL090C   | YJL089W   | SIP4   | YJL090C | DPB11  |      |
| Static | iYDL055C-0 | YDL055C   | PSA1   |         |        |      |
| Static | iYMR143W   | YMR144W   |        |         |        |      |
| Static | iYOR340C   | YOR341W   | RPA190 | YOR340C | RPA43  |      |
| Static | iYBR188C   | YBR189W   | RPS9B  | YBR188C | NTC20  |      |
| Static | iYDL169C   | YDL169C   | UGX2   | YDL168W | SFA1   |      |
| Static | iYEL023C   | YEL022W   | GEA2   | YEL023C |        |      |
| Static | iYLR406C   | YLR406C   | RPL31B | YLR407W |        |      |
| Static | iYHR032W   | YHR033W   |        |         |        |      |
| Static | iYLR287C-A | YLR287C-A | RPS30A |         |        |      |
| Static | YNL102W    | YNL102W   | POL1   |         |        | 2    |
| Static | iYLR264W   |           |        |         |        |      |
| Static | iYGR033C   | YGR033C   |        | YGR034W | RPL26B |      |
| Static | iYGR027C   | YGR027C   | RPS25A |         |        |      |
| Static | iYGR180C   | YGR180C   | RNR4   | YGR181W | TIM13  |      |
| Static | iYNL096C   | YNL096C   | RPS7B  |         |        |      |
| Static | YEL045C    | YEL046C   | GLY1   | YEL044W |        | 1    |
| Static | iYJR145C   | YJR145C   | RPS4A  | YJR146W |        |      |
| Static | iYBL028C   | YBL028C   |        | YBL027W | RPL19B |      |
| Static | YJL096W    | YJL096W   | MRPL49 | YJL095W | BCK1   | 1, 2 |
| Static | iYHL038C   | YHL038C   | CBP2   | YHL036W | MUP3   |      |
| Static | iYKR092C-0 | YKR092C   | SRP40  | YKR093W | PTR2   |      |
| Static | YLR184W    | YLR185W   | RPL37A | YLR183C | TOS4   | 1    |
| Static | iYNL254C   | YNL254C   |        | YNL253W |        |      |
| Static | iYER056C-A | YER056C-A | RPL34A |         |        |      |
| Static | iYOL128C   | YOL127W   | RPL25  | YOL128C |        |      |
| Static | iYKL006C-A | YKL006C-A |        | YKL006W | RPL14A |      |
| Static | YDR024W    | YDR024W   | FYV1   | YDR025W | RPS11A | 1    |
| Static | YER168C    | YER169W   | RPH1   | YER168C | CCA1   |      |
| Static | iYLR333C   | YLR333C   | RPS25B | YLR335W | NUP2   |      |
| Static | iYDL076C   | YDL076C   |        | YDL075W | RPL31A |      |
| Static | iYMR242C   | YMR242C   | RPL20A |         |        |      |
| Static | iYKL181W   | YKL180W   | RPL17A |         |        |      |
| Static | iYPL132W   | YPL131W   | RPL5   |         |        |      |
| Static | iYOR366W   | YOR365C   |        | YOR367W | SCP1   |      |
| Static | iYLL039C   | YLL039C   | UBI4   | YLL037W |        |      |
| Static | iYLR447C   | YLR447C   | VMA6   | YLR448W | RPL6B  |      |
| Static | iYPR105C   | YPR105C   |        | YPR106W | ISR1   |      |
| Static | iYFL051C-1 |           |        |         |        |      |
| Static | YBR196C    | YBR196C   | PGI1   |         |        |      |

|        |            |           |        |           |        |      |
|--------|------------|-----------|--------|-----------|--------|------|
| Static | YLR255C    | YLR256W   | HAP1   | YLR254c   |        | 1    |
| Static | YKL031W    | YKL031W   |        | YKL032C   | IXR1   | 1, 2 |
| Static | iYOL086C   | YOL086C   | ADH1   | YOL084W   | PHM7   |      |
| Static | iYLR325C   | YLR325C   | RPL38  | YLR326W   |        |      |
| Static | iYOR344C-0 | YOR344C   | TYE7   |           |        |      |
| Static | iYGL147C   | YGL147C   | RPL9A  |           |        |      |
| Static | iYDL034W   | YDL035C   | GPR1   |           |        |      |
| Static | iYOR301W   | YOR302W   |        | YOR303W   | CPA1   |      |
| Static | iYNL144C-0 | YNL144C   |        |           |        |      |
| Static | iYER033C   | YER034W   |        | YER033C   | ZRG8   |      |
| Static | iYNL191W   | YNL190W   |        |           |        |      |
| Static | iYPL199C   | YPL198W   | RPL7B  | YPL199C   |        |      |
| Static | iYOR124C   | YOR124C   | UBP2   |           |        |      |
| Static | iYAL053W   | YAL051W   | OAF1   |           |        |      |
| Static | iYKL183W   | YKL182W   | FAS1   |           |        |      |
| Static | iYFL022C   | YFL021W   | GAT1   | YFL022C   | FRS2   |      |
| Static | iYOR354C-0 | YOR354C   | MSC6   | YOR355W   | GDS1   |      |
| Static | iYOR358W   | YOR359W   |        |           |        |      |
| Static | iYFL034C-A | YFL034W   |        | YFL034C-B |        |      |
| Static | iYLL002W   | YLL001W   | DNM1   |           |        |      |
| Static | iYBL072C   | YBL072C   | RPS8A  | YBL069W   | AST1   |      |
| Static | iYOL053C-A | YOL052C-A |        |           |        |      |
| Static | iYBL061C   | YBL061C   | SKT5   | YBL060W   |        |      |
| Static | iYMR265C   | YMR265C   |        | YMR266W   | RSN1   |      |
| Static | SNR189     | YCR031C   | RPS14A | YCR032W   | BPH1   | 1    |
| Static | iYPR110C   | YPR111W   | DBF20  | YPR110C   | RPC40  |      |
| Static | iYAL040C   | YAL040C   | CLN3   |           |        |      |
| Static | iYBR181C   | YBR181C   | RPS6B  |           |        |      |
| Static | iYiL069C   | YiL069C   | RPS24B |           |        |      |
| Static | iYNL311C   | YNL311C   |        | YNL309W   | STB1   |      |
| Static | iYLR060W   | YLR061W   | RPL22A |           |        |      |
| Static | iYDR259C   | YDR259C   | YAP6   |           |        |      |
| Static | iYER158C   | YER158C   |        |           |        |      |
| Static | iYKL063C-1 | YKL062W   | MSN4   | YKL063C   |        |      |
| Static | iYMR224C   | YMR224C   | MRE11  |           |        |      |
| Static | iYJL178C   | YJL177W   | RPL17B | YJL178C   |        |      |
| Static | YGR203W    | YGR204W   | ADE3   | YGR202C   | PCT1   | 1    |
| Static | iYML089C   | YML088W   | UFO1   | YML089C   |        |      |
| Static | iYHL033C   | YHL033C   | RPL8A  |           |        |      |
| Static | iYKL157W   | YKL156W   | RPS27A |           |        |      |
| Static | iYLR387C   | YLR388W   | RPS29A | YLR387C   |        |      |
| Static | YGR117C    | YGR118W   | RPS23A |           |        | 1    |
| Static | iYPR029C   | YPR030W   | CSR2   | YPR029C   | APL4   |      |
| Static | iYDR324C   | YDR324C   |        | YDR325W   | YCG1   |      |
| Static | iYOR312C   | YOR312C   | RPL20B |           |        |      |
| Static | iYPR042C   | YPR043W   | RPL43A | YPR042C   | PUF2   |      |
| Static | YMR082C    | YMR082C   |        | YMR081C   | ISF1   | 1, 2 |
| Static | iYMR250W   | YMR251W   |        | YMR250W   | GAD1   |      |
| Static | iYEL057C   | YEL057C   |        | YEL056W   | HAT2   |      |
| Static | iYKR094C   | YKR095W   | MLP1   | YKR094C   | RPL40B |      |
| Static | iYML073C   | YML073C   | RPL6A  |           |        |      |
| Static | iYHL016C   | YHL016C   | DUR3   | YHL015W   | RPS20  |      |

|        |               |          |        |          |        |   |
|--------|---------------|----------|--------|----------|--------|---|
| Static | iYLR074C      | YLR074C  | BUD20  | YLR075W  | RPL10  |   |
| Static | iYGR283C      | YGR283C  |        |          |        |   |
| Static | iYAL039C-1    | YAL038W  | CDC19  |          |        |   |
| Static | iYiL122W      | YiL121W  |        |          |        |   |
| Static | iYMR127C      | YMR128W  | ECM16  | YMR127C  | SAS2   |   |
| Static | iYDL061C      | YDL061C  | RPS29B | YDL060W  | TSR1   |   |
| Static | iYDR099W      | YDR100W  |        |          |        |   |
| Static | iYGR050C      | YGR050C  |        | YGR052W  |        |   |
| Static | iTM(CAU)O2    |          |        |          |        |   |
| Static | iYOR179C-1    | YOR179C  |        |          |        |   |
| Static | iYBL030C-1    | YBL029W  |        |          |        |   |
| Static | iYOR316C-1    | YOR317W  | FAA1   | YOR316C  | COT1   |   |
| Static | iYKL200C      | YKL201C  | MNN4   |          |        |   |
| Static | iYKR056W      | YKR057W  | RPS21A |          |        |   |
| Static | iYLR412W-1    | YLR413W  |        |          |        |   |
| Static | iSNR66        | YNL025C  | SSN8   |          |        |   |
| Static | iYOR056C      | YOR056C  |        | YOR057W  | SGT1   |   |
| Static | iYDR076W      | YDR077W  | SED1   |          |        |   |
| Static | iYNL179C-1    | YNL178W  | RPS3   | YNL179C  |        |   |
| Static | iYARWDELTA7   | YAR035W  | YAT1   |          |        |   |
| Static | iYiL057C      | YiL057C  |        |          |        |   |
| Static | iYLR103C      | YLR103C  | CDC45  | YLR104W  |        |   |
| Static | iYCL025C      | YCL025C  | AGP1   | YCL024W  | KCC4   |   |
| Static | iYNR069C-0    | YNR069C  |        |          |        |   |
| Static | iYGR258C-0    | YGR258C  | RAD2   | YGR260W  | TNA1   |   |
| Static | iYAL054C      | YAL054C  | ACS1   | YAL053W  |        |   |
| Static | iYiL149C      | YiL149C  | MLP2   | YiL148W  | RPL40A |   |
| Static | iYMR092C      | YMR093W  |        | YMR092C  | AIP1   |   |
| Static | iYJL207C      | YJL207C  |        |          |        |   |
| Static | iSNR190       | YJL148W  | RPA34  |          |        |   |
| Static | iYBR179C      | YBR180W  | DTR1   | YBR179C  | FZO1   |   |
| Static | iYLR338W      | YLR340W  | RPP0   |          |        |   |
| Static | iYLL044w      | YLL045C  | RPL8B  |          |        |   |
| Static | YDR193W       | YDR192C  | NUP42  |          |        | 1 |
| Static | iYNL163C      | YNL163C  | RIA1   | YNL162W  | RPL42A |   |
| Static | iYPL076W-0    | YPL075W  | GCR1   |          |        |   |
| Static | iYEL022W      | YEL021W  | URA3   |          |        |   |
| Static | iYPL227C      | YPL226W  | NEW1   | YPL227C  | ALG5   |   |
| Static | iYCRCDELTA6-A | TP(AGG)C |        |          |        |   |
| Static | iYBR060C-0    | YBR060C  | ORC2   |          |        |   |
| Static | iYLR327C      | YLR327C  |        | TS(GCU)L |        |   |
| Static | YHR021W-A     | YHR021C  | RPS27B |          |        | 1 |
| Static | iYOR337W      | YOR338W  |        |          |        |   |
| Static | iYER130C      | YER130C  |        | YER131W  | RPS26B |   |
| Static | YGRWDELTA19   |          |        |          |        |   |
| Static | iYMR116C      | YMR116C  | ASC1   |          |        |   |
| Static | iYER101C      | YER101C  | AST2   | YER102W  | RPS8B  |   |
| Static | iYLR029C      | YLR029C  | RPL15A | YLR030W  |        |   |
| Static | iYLR303W      |          |        |          |        |   |
| Static | iYBR296C-0    | YBR296C  | PHO89  | YBR297W  | MAL33  |   |
| Static | YPL111W       | YPL111W  | CAR1   |          |        | 2 |
| Static | iYGR035C      |          |        |          |        |   |

|           |               |          |        |            |       |      |  |
|-----------|---------------|----------|--------|------------|-------|------|--|
| Static    | iSNR62        | YOR043W  | WHI2   |            |       |      |  |
| Static    | iYKL040C      |          |        |            |       |      |  |
| Static    | iYPR008W      | YPR009W  |        |            |       |      |  |
| Static    | YLR101C       | YLR099C  | ICT1   | YLR100W    | ERG27 | 1    |  |
| Static    | RDN25-1C      | RDN25-1B |        | RDN25-1C   |       |      |  |
| Telomeric | iYDR543C      | YDR543C  |        |            |       |      |  |
| Telomeric | YHR217C       |          |        |            |       |      |  |
| Telomeric | iYFL064C      | YFL064C  |        | YFL063W    |       |      |  |
| Telomeric | iYLR460C-1    | YLR461W  | PAU4   |            |       | 3    |  |
| Telomeric | iYML133C-0    | YML133C  |        |            |       |      |  |
| Telomeric | YEL074W       | YEL075C  |        |            |       | 1    |  |
| Telomeric | YAR073W       | YAR075W  |        |            |       | 1    |  |
| Telomeric | iYLL067C-1    | YLL067C  |        |            |       |      |  |
| Telomeric | iYERWOMEGA2-0 |          |        |            |       |      |  |
| Telomeric | TEL9L         |          |        |            |       |      |  |
| Telomeric | YJR162C       | YJR161C  | COS5   |            |       |      |  |
| Telomeric | TEL15R-1      |          |        |            |       |      |  |
| Telomeric | YMR326C       |          |        |            |       |      |  |
| Telomeric | iYJL225C-0    | YJL225C  |        |            |       |      |  |
| Telomeric | YKL225W       |          |        |            |       |      |  |
| Telomeric | YNR076W       |          |        |            |       |      |  |
| Telomeric | iYGR295C-1    | YGR296W  | YRF1-3 |            |       |      |  |
| Telomeric | TEL6R         |          |        |            |       |      |  |
| Telomeric | YHR219W       |          |        |            |       |      |  |
| Telomeric | iYiL177C-0    | YiL177C  |        |            |       |      |  |
| Telomeric | iYGL259W-1    | YGL258W  |        |            |       |      |  |
| Telomeric | iYLR466W      | YLR465C  |        | YLR463C    |       |      |  |
| Telomeric | TEL15R-6      |          |        |            |       |      |  |
| Telomeric | iYPR201W-1    | YPR202W  |        | YPR203W    |       |      |  |
| Telomeric | YBL113C       |          |        |            |       |      |  |
| Telomeric | YCLWOMEGA1    | YCL076W  |        | YCLWTY5-1A |       |      |  |
| Telomeric | YAL067C       |          |        |            |       |      |  |
| Telomeric | iYDR541C-0    | YDR541C  |        |            |       |      |  |
| Telomeric | iYAL068C-0    | YAL068C  |        |            |       |      |  |
| Telomeric | YiR040C       | YiR041W  |        |            |       | 1    |  |
| Telomeric | YiL175W       | YiL175W  |        | YiL176c    |       | 1, 2 |  |
| Telomeric | iYGL261C      | YGL260W  |        | YGL261C    |       |      |  |
| Telomeric | YKL223W       | YKL224C  |        |            |       | 1    |  |
| Other     | iYNL217W      | YNL216W  | RAP1   |            |       | 4    |  |
| Other     | YGR031W       | YGR030C  | POP6   | YGR032W    | GSC2  | 1, 4 |  |
| Other     | iYLL051C      | YLL051C  | FRE6   | YLL049W    |       | 4    |  |
| Other     | YCL042W       | YCL040W  | GLK1   | YCL041C    |       | 1, 4 |  |
| Other     | iYGL084C      | YGL084C  | GUP1   | YGL083W    | SCY1  | 4    |  |
| Other     | iYER045C-0    | YER045C  | ACA1   | YER046W    | SPO73 | 4    |  |
| Other     | YNL150W       | YNL151C  | RPC31  |            |       | 1, 4 |  |
| Other     | YDL230W       | YDL229W  | SSB1   | YDL231C    | BRE4  | 1, 4 |  |
| Other     | iSNR47        | YDR042C  |        |            |       | 4    |  |
| Other     | iYPL095C      | YPL095C  |        |            |       | 4    |  |
| Other     | iYPL001W      | YPR001W  | CIT3   |            |       | 4    |  |
| Other     | iYDR343C      | YDR343C  | HXT6   |            |       | 4    |  |
| Other     | iYKL152C      | YKL152C  | GPM1   |            |       | 4    |  |
| Other     | iYJR009C-0    | YJR009C  | TDH2   | YJR010W    | MET3  | 4    |  |

|       |           |         |       |         |      |         |
|-------|-----------|---------|-------|---------|------|---------|
| Other | iYOR112W  | YOR113W | AZF1  |         |      | 4       |
| Other | iYJL078C  | YJL078C | PRY3  | YJL076W | NET1 | 4       |
| Other | iTW(CCA)J |         |       |         |      | 4       |
| Other | iYOR369C  | YOR369C | RPS12 |         |      | 4       |
| Other | iYNR017W  | YNR018W |       |         |      | 4       |
| Other | iYCL030C  | YCL030C | HIS4  |         |      | 4       |
| Other | YDR451C   | YDR452W | PHM5  | YDR451C | YHP1 | 1, 2, 4 |
| Other | iYKL016C  | YKL015W | PUT3  | YKL016C | ATP7 | 4       |
| Other | YHR178W   | YHR179W | OYE2  |         |      | 1, 4    |
| Other | iYDR311W  | YDR312W | SSF2  |         |      | 4       |
| Other | YCR068W   | YCR069W |       | YCR067C | SED4 | 1, 4    |
| Other | iYKL060C  | YKL060C | FBA1  |         |      | 4       |
| Other | iYDR408C  | YDR409W |       | YDR408C | ADE8 | 4       |
| Other | YDR319C   | YDR319C |       |         |      | 2, 4    |
| Other | iYMR295C  | YMR295C |       |         |      | 4       |
| Other | TS(UGA)P  | YPR072W | NOT5  |         |      | 1, 4    |
| Other | iYDR135C  | YDR135C | YCF1  | YDR137W | RGP1 | 4       |
| Other | iYOR032C  | YOR032C | HMS1  |         |      | 4       |
| Other | iYPR054W  | YPR055W | SEC8  |         |      | 4       |
| Other | iYJR131W  | YJR132W | NMD5  |         |      | 4       |
| Other | YGR210C   | YGR209C | TRX2  | YGR211W | ZPR1 | 1, 4    |
| Other | YDR197W   | YDR196C |       | YDR197W | CBS2 | 1, 2, 4 |

**Notes** - All peaks of binding were confirmed manually. The downstream targets for any peak centered on a ORF were assigned to (1) the nearest downstream ORFs, and/or (2) to itself. (3) A doublet peak was observed. (4) "Other" targets are not represented on Figure 1, and consist of targets that are strongly bound at at least two time points but fail to meet the criteria for the other three categories.
